# Supplementary material for: Use of HIV pre-exposure prophylaxis among urban Canadian gay, bisexual and other men who have sex with men: a cross-sectional analysis of the Engage cohort study
Source: PubMed Central journal article supplement — CMAJ Open. 2021 May 21;9(2):E529–38. doi: 10.9778/cmajo.20200198 (PMC8177951; doi:10.9778/cmajo.20200198), 2021-05-21
Supplement: supp_9.2.E529_2020-0198-2-at.pdf [file supp_9.2.E529_2020-0198-2-at.pdf]

**Selected measures and corresponding Engage questionnaire items**

| Measure/variable                                                                                                                   | Engage questionnaire item                                                                                                                                                                                                                                                                                                                                                                                                                                                       |
|------------------------------------------------------------------------------------------------------------------------------------|---------------------------------------------------------------------------------------------------------------------------------------------------------------------------------------------------------------------------------------------------------------------------------------------------------------------------------------------------------------------------------------------------------------------------------------------------------------------------------|
| Awareness of PrEP                                                                                                                  | <p><b>Definition:</b> “PrEP” stands for <i>Pre</i>-Exposure Prophylaxis. PrEP is a new highly effective HIV prevention method whereby a HIV-negative person takes a prescription HIV medication, Truvada, that was developed to <i>treat</i> HIV infection in HIV positive people, but can also be used by HIV negative people to <i>lower risk of HIV infection</i> if taken as prescribed.(1)</p> <p>Before today, had you ever heard of PrEP (Pre-Exposure Prophylaxis)?</p> |
| Perceived need for PrEP                                                                                                            | In the past 6 months, have you felt the need to go on PrEP?                                                                                                                                                                                                                                                                                                                                                                                                                     |
| Trying to access PrEP                                                                                                              | In the past 6 months, have you tried to go on PrEP?                                                                                                                                                                                                                                                                                                                                                                                                                             |
| Use of PrEP (continuous or on-demand)                                                                                              | <p>Derived variable using the following questions:<br/>           Have you ever taken PrEP yourself?<br/>           (if yes) When did you last take PrEP?<br/>           Are you currently on PrEP?</p>                                                                                                                                                                                                                                                                         |
| Social network size                                                                                                                | <p>How many men who have sex with men aged 16 years or older, including trans men, do you know who live or work in the (insert city) metropolitan area (whether they identify as gay or otherwise)?</p> <p><i>This includes gay/bi guys you see or speak to regularly; e.g., close friends, boyfriends, spouses, regular sex partners, roommates, relatives, people you regularly hang out with, etc.</i></p>                                                                   |
| <i>Variables specific to the Canadian clinical recommendations for PrEP:</i>                                                       |                                                                                                                                                                                                                                                                                                                                                                                                                                                                                 |
| Condomless anal sex within the last six months                                                                                     | During the past 6 months, have you had anal sex without a condom (as top or bottom) with at least one guy?                                                                                                                                                                                                                                                                                                                                                                      |
| Infectious syphilis or rectal bacterial sexually transmitted infection (STI), particularly if diagnosed in the preceding 12 months | When was the last time a doctor or nurse told you that you had any of the following sexually transmitted infections? -> Chlamydia, Gonorrhea, Syphilis                                                                                                                                                                                                                                                                                                                          |
| Recurrent use of nonoccupational postexposure prophylaxis (nPEP) (more than once)                                                  | How many times in your life have you started a course of PEP (post-exposure prophylaxis) after a potential exposure to HIV, sexual or otherwise? If you're not sure, please give your best guess                                                                                                                                                                                                                                                                                |
| Ongoing sexual relationship with HIV-positive partner with substantial risk of transmissible HIV                                   | Do you know the most recent HIV viral load of your main partner? (the HIV Viral Load test is a measure of the amount of HIV in someone's blood)                                                                                                                                                                                                                                                                                                                                 |
| <i>Variables specific to the HIV incidence risk index for men who have sex with men (HIRI-MSM) (2)</i>                             |                                                                                                                                                                                                                                                                                                                                                                                                                                                                                 |
| How old are you today (yrs)?                                                                                                       | What is your age (i.e., how old are you)?                                                                                                                                                                                                                                                                                                                                                                                                                                       |

Appendix 2, as supplied by the authors. Appendix to: Cox J, Apelian H, Moodie EEM, et al. Use of HIV pre-exposure prophylaxis among urban Canadian gay, bisexual and other men who have sex with men: a cross-sectional analysis of the Engage cohort study. *CMAJ Open* 2021. DOI:10.9778/cmajo.20200198. Copyright © 2021 The Author(s) or their employer(s). To receive this resource in an accessible format, please contact us at [cmajgroup.cmajca](mailto:cmajgroup.cmajca).

|                                                                                                                          |                                                                                                                                                                                                                                                                                                                                                         |
|--------------------------------------------------------------------------------------------------------------------------|---------------------------------------------------------------------------------------------------------------------------------------------------------------------------------------------------------------------------------------------------------------------------------------------------------------------------------------------------------|
| How many men have you had sex with in the last 6 months?                                                                 | During the past 6 months, with how many guys have you had any kind of sex (anal, oral, mutual masturbation, rimming, etc.)?<br>Of the [ <i>insert response</i> ] men you had any kind of sex with in the past 6 months, how many of them did you have oral or anal sex with?                                                                            |
| In the last 6 months, how many times did you have receptive anal sex (you were the bottom) with a man?                   | In the past 6 months, how many times did you have RECEPTIVE anal sex (you were the BOTTOM) without a condom?                                                                                                                                                                                                                                            |
| How many of your male sex partners were HIV positive?                                                                    | Of the [ <i>insert response</i> ] men you had <u>oral or anal sex</u> with in the past 6 months:<br>How many men were HIV positive?<br>____ HIV positive men                                                                                                                                                                                            |
| In the last 6 months, how many times did you have insertive anal sex (you were the top) with a man who was HIV positive? | In the past 6 months, how many times did you have INSERTIVE anal sex (you were the TOP) without a condom?<br>__ times<br><br>In the past 6 months, of the [ <i>insert response</i> ] times you had INSERTIVE anal sex (you were the TOP) without a condom, how many of those times was it with:<br>a. Someone who you knew was HIV positive? __ times   |
| In the last 6 months, have you used methamphetamines such as crystal or speed?                                           | In your life, have you <b>EVER</b> used any of the following <u>substances</u> ? (NON-MEDICAL USE ONLY)<br>- Crystal Methamphetamine (“Crystal”, “meth”)<br>- Speed; e.g., Dexedrine, Amphetamines (NOT on prescription)<br>- Never<br>- Yes, in the past 6 months<br>- Yes, in my lifetime, but more than 6 months ago<br>- Don’t know/ Don’t remember |

## References

- Centers for Disease Control and Prevention. US Public Health Service. Preexposure prophylaxis for the prevention of HIV infection in the United States—2017 Update: a clinical practice guideline [Internet]. 2018 [cited 2020 Apr 3]. Available from: [http://www.cfenet.ubc.ca/sites/default/files/uploads/publications/centredocs/prep\\_guidelines-14-aug-2019.pdf](http://www.cfenet.ubc.ca/sites/default/files/uploads/publications/centredocs/prep_guidelines-14-aug-2019.pdf)
- Smith DK, Pals SL, Herbst JH, Shinde S, Carey JW. Development of a clinical screening index predictive of incident HIV infection among men who have sex with men in the United States. *J Acquir Immune Defic Syndr*. 2012 Aug 1;60(4):421–7.
