# Supplementary material for: Use of HIV pre-exposure prophylaxis among urban Canadian gay, bisexual and other men who have sex with men: a cross-sectional analysis of the Engage cohort study
Source: PubMed Central journal article supplement — CMAJ Open. 2021 May 21;9(2):E529–38. doi: 10.9778/cmajo.20200198 (PMC8177951; doi:10.9778/cmajo.20200198), 2021-05-21
Supplement: supp_9.2.E529_2020-0198-3-at.pdf [file supp_9.2.E529_2020-0198-3-at.pdf]

## Additional tables and figures of study results

| Table S1: PrEP access among self-reported HIV-negative or unknown participant stratified by clinical recommendations for PrEP (n=1949)* |                  |                         |             |                        |                  |                         |             |                         |                   |                         |             |                         |
|-----------------------------------------------------------------------------------------------------------------------------------------|------------------|-------------------------|-------------|------------------------|------------------|-------------------------|-------------|-------------------------|-------------------|-------------------------|-------------|-------------------------|
|                                                                                                                                         | Montreal (n=934) |                         |             |                        | Toronto (n= 403) |                         |             |                         | Vancouver (n=612) |                         |             |                         |
| Clinically recommended PrEP?                                                                                                            | No (n=423)       |                         | Yes (n=511) |                        | No (n=156)       |                         | Yes (n=247) |                         | No (n=211)        |                         | Yes (n=401) |                         |
|                                                                                                                                         | Crude%           | RDS adjusted % (95% CI) | Crude %     | RDS adjusted% (95% CI) | Crude %          | RDS adjusted % (95% CI) | Crude %     | RDS adjusted % (95% CI) | Crude %           | RDS adjusted % (95% CI) | Crude %     | RDS adjusted % (95% CI) |
| <b>Aware of PrEP</b>                                                                                                                    | 72.3             | 64.4<br>(56.0-72.8)     | 93.2        | 84.6<br>(79.3-90.0)    | 87.8             | 74.2<br>(62.5-86.0)     | 96.4        | 94.2<br>(87.7-100.0)    | 87.2              | 68.3<br>(57.4-79.2)     | 96.3        | 92.7<br>(88.2-97.3)     |
| <b>Felt the need for PrEP (P6M)</b>                                                                                                     | 14.2             | 12.3<br>(7.2-17.4)      | 51.9        | 39.2<br>(31.7-46.7)    | 21.2             | 12.7<br>(5.7-19.6)      | 64.4        | 56.1<br>(45.2-67.0)     | 32.2              | 24.0<br>(13.4-34.6)     | 63.3        | 49.0<br>(40.7-57.3)     |
| <b>Tried to obtain PrEP (P6M)</b>                                                                                                       | 4.5              | 4.4<br>(1.6-7.2)        | 27.0        | 20.6<br>(14.0-27.3)    | 7.1              | 3.7<br>(0.5-6.8)        | 40.1        | 33.2<br>(23.5-43.0)     | 13.3              | 11.5<br>(3.4-19.6)      | 42.1        | 29.6<br>(22.2-37.1)     |
| <b>Has used PrEP (P6M)</b>                                                                                                              | 2.1              | 1.5<br>(0.6-2.5)        | 21.1        | 14.5<br>(8.4-20.5)     | 5.1              | 2.2<br>(0.5-3.8)        | 31.6        | 21.6<br>(13.1-30.1)     | 6.6               | 7.6<br>(0.2-14.9)       | 33.2        | 21.8<br>(15.1-28.5)     |

RDS respondent driven sampling, CI confidence interval  
 \*Among 2008 HIV-negative or unknown participants, 59 had missing data and determination of clinical recommendations was not possible.

**Table S2.1: Factors\* associated with not using PrEP among self-reported HIV-negative or unknown participants for whom PrEP is clinically recommended stratified by city of recruitment and PrEP use (n=1100)**

|                                                                  |                                    | Montreal (n=476) |                        |             |                        | Toronto (n=238) |                        |            |                        | Vancouver (n=386) |                        |             |                        |
|------------------------------------------------------------------|------------------------------------|------------------|------------------------|-------------|------------------------|-----------------|------------------------|------------|------------------------|-------------------|------------------------|-------------|------------------------|
| Used PrEP in the P6M?                                            |                                    | No (n=368)       |                        | Yes (n=108) |                        | No (n=160)      |                        | Yes (n=78) |                        | No (n=253)        |                        | Yes (n=133) |                        |
|                                                                  |                                    | Crude %          | RDS adjusted % (95%CI) | Crude %     | RDS adjusted % (95%CI) | Crude %         | RDS adjusted % (95%CI) | Crude %    | RDS adjusted % (95%CI) | Crude %           | RDS adjusted % (95%CI) | Crude %     | RDS adjusted % (95%CI) |
| <b>I. Sociodemographic characteristics</b>                       |                                    |                  |                        |             |                        |                 |                        |            |                        |                   |                        |             |                        |
| <b>Age</b>                                                       | 30 years or older                  | 50.0             | 43.4 (34.1-52.7)       | 67.6        | 55.2 (37.0-73.5)       | 40.6            | 38.6 (26.8-50.4)       | 70.5       | 53.5 (32.3-74.7)       | 43.5              | 34.0 (24.3-43.6)       | 64.7        | 60.8 (46.4-75.1)       |
|                                                                  | Less than 30 years                 | 50.0             | 56.6 (47.3-65.9)       | 32.4        | 44.8 (26.5-63.0)       | 59.4            | 61.4 (49.6-73.2)       | 29.5       | 46.5 (25.3-67.7)       | 56.5              | 66.0 (56.4-75.7)       | 35.3        | 39.2 (24.9-53.6)       |
| <b>Education</b>                                                 | Greater than highschool            | 87.8             | 87.1 (81.8-92.3)       | 86.1        | 90.5 (80.0-101.0)      | 89.4            | 85.2 (77.3-93.2)       | 96.2       | 99.0 (98.1-100.0)      | 89.3              | 91.8 (87.2-96.4)       | 92.5        | 92.8 (86.0-99.5)       |
|                                                                  | No more than high school           | 12.2             | 12.9 (7.7-18.2)        | 13.9        | 9.5 (0.0-20.0)         | 10.6            | 14.8 (6.8-22.7)        | 3.8        | 1.0 (0.0-1.9)          | 10.7              | 8.2 (3.6-12.8)         | 7.5         | 7.2 (0.5-14.0)         |
| <b>Income</b>                                                    | 30 000 CAD or more                 | 45.4             | 33.4 (25.5-41.4)       | 58.3        | 42.7 (24.8-60.7)       | 53.1            | 49.3 (36.8-61.8)       | 67.9       | 55.2 (33.5-76.9)       | 58.1              | 42.9 (32.2-53.5)       | 63.9        | 57.6 (42.2-73.0)       |
|                                                                  | <30 000 CAD                        | 54.6             | 66.6 (58.6-74.5)       | 41.7        | 57.3 (39.3-75.2)       | 46.9            | 50.7 (38.2-63.2)       | 32.1       | 44.8 (23.1-66.5)       | 41.9              | 57.1 (46.5-67.8)       | 36.1        | 42.4 (27.0-57.8)       |
| <b>In a relationship with a main partner</b>                     | No                                 | 50.3             | 45.1 (36.0-54.1)       | 60.2        | 60.8 (41.7-79.9)       | 44.4            | 38.6 (27.0-50.2)       | 52.6       | 58.4 (39.2-77.6)       | 50.6              | 41.6 (31.5-51.7)       | 54.9        | 64.6 (51.2-78.1)       |
|                                                                  | Yes                                | 49.7             | 54.9 (45.9-64.0)       | 39.8        | 39.2 (20.1-58.3)       | 55.6            | 61.4 (49.8-73.0)       | 47.4       | 41.6 (22.4-60.8)       | 49.4              | 58.4 (48.3-68.5)       | 45.1        | 35.4 (21.9-48.8)       |
| <b>II. Sexual behavioural characteristics</b>                    |                                    |                  |                        |             |                        |                 |                        |            |                        |                   |                        |             |                        |
| <b>Viral load sorting as HIV prevention strategy</b>             | No                                 | 83.2             | 81.9 (74.6-89.3)       | 62.0        | 67.0 (49.1-84.8)       | 81.2            | 86.4 (77.2-95.5)       | 57.7       | 63.3 (48.2-78.4)       | 81.4              | 92.5 (88.0-96.9)       | 55.6        | 70.2 (56.8-83.6)       |
|                                                                  | Yes                                | 16.8             | 18.1 (10.7-25.4)       | 38.0        | 33.0 (15.2-50.9)       | 18.8            | 13.6 (4.5-22.8)        | 42.3       | 36.7 (21.6-51.8)       | 18.6              | 7.5 (3.1-12.0)         | 44.4        | 29.8 (16.4-43.2)       |
| <b>III. Dimensions related to perceiving the need for care</b>   |                                    |                  |                        |             |                        |                 |                        |            |                        |                   |                        |             |                        |
| <b>3.1 Perceived risk of HIV infection</b>                       |                                    |                  |                        |             |                        |                 |                        |            |                        |                   |                        |             |                        |
| <b>"I don't feel that I am at high enough risk to use PrEP."</b> | Strongly disagree/disagree/neutral | 54.4             | 56.0 (46.9-65.1)       | 88.0        | 80.9 (62.6-99.3)       | 54.1            | 50.2 (37.9-62.4)       | 98.7       | 99.6 (99.2-100.0)      | 56.9              | 50.7 (39.8-61.6)       | 90.8        | 92.1 (84.0-100.0)      |
|                                                                  | Agree/strongly agree               | 45.6             | 44.0 (34.9-53.1)       | 12.0        | 19.1 (0.7-37.4)        | 45.9            | 49.8 (37.6-62.1)       | 1.3        | 0.4 (0.0-0.8)          | 43.1              | 49.3 (38.4-60.2)       | 9.2         | 7.9 (0.0-16.0)         |

|                                                                                   |                                           | Montreal (n=476) |                  |             |                  | Toronto (n=238) |                  |            |                   | Vancouver (n=386) |                  |             |                  |
|-----------------------------------------------------------------------------------|-------------------------------------------|------------------|------------------|-------------|------------------|-----------------|------------------|------------|-------------------|-------------------|------------------|-------------|------------------|
| Used PrEP in the P6M?                                                             |                                           | No (n=368)       |                  | Yes (n=108) |                  | No (n=160)      |                  | Yes (n=78) |                   | No (n=253)        |                  | Yes (n=133) |                  |
|                                                                                   |                                           | Crude %          | RDS % (95%CI)    | Crude %     | RDS % (95%CI)    | Crude %         | RDS % (95%CI)    | Crude %    | RDS % (95%CI)     | Crude %           | RDS % (95%CI)    | Crude %     | RDS % (95%CI)    |
| "HIV/AIDS is a less serious threat than it used to be because of new treatments." | Strongly agree/agree                      | 50.1             | 49.6 (40.4-58.8) | 60.2        | 62.6 (45.2-80.1) | 67.5            | 70.4 (60.3-80.6) | 80.8       | 82.4 (71.2-93.7)  | 72.7              | 59.2 (48.1-70.2) | 82.7        | 73.6 (61.4-85.7) |
|                                                                                   | Disagree/strongly disagree                | 49.9             | 50.4 (41.2-59.6) | 39.8        | 37.4 (19.9-54.8) | 32.5            | 29.6 (19.4-39.7) | 19.2       | 17.6 (6.3-28.8)   | 27.3              | 40.8 (29.8-51.9) | 17.3        | 26.4 (14.3-38.6) |
| <b>3.2 Knowledge about PrEP</b>                                                   |                                           |                  |                  |             |                  |                 |                  |            |                   |                   |                  |             |                  |
| "I know enough about PrEP to tell if it's right for me or not."                   | Strongly agree/agree/neutral              | 69.6             | 63.2 (53.7-72.6) | 79.6        | 89.3 (81.9-96.7) | 72.2            | 75.9 (65.1-86.8) | 85.9       | 81.8 (63.8-99.8)  | 71.7              | 75.5 (67.0-84.1) | 84.0        | 86.4 (79.0-93.8) |
|                                                                                   | Disagree/strongly disagree                | 30.4             | 36.8 (27.4-46.3) | 20.4        | 10.7 (3.3-18.1)  | 27.8            | 24.1 (13.2-34.9) | 14.1       | 18.2 (0.2-36.2)   | 28.3              | 24.5 (15.9-33.0) | 16.0        | 13.6 (6.2-21.0)  |
| "In your opinion, how effective is PrEP at preventing HIV infection?"             | Completely/very                           | 65.8             | 44.4 (35.3-53.6) | 91.7        | 82.3 (69.1-95.5) | 77.5            | 69.8 (57.9-81.7) | 98.7       | 98.8 (95.0-102.7) | 73.9              | 62.3 (52.0-72.7) | 95.5        | 95.0 (90.1-99.9) |
|                                                                                   | Moderately/a little/not at all/no opinion | 34.2             | 55.6 (46.4-64.7) | 8.3         | 17.7 (4.5-30.9)  | 22.5            | 30.2 (18.3-42.1) | 1.3        | 1.2 (0.0-5.0)     | 26.1              | 37.7 (27.3-48.0) | 4.5         | 5.0 (0.1-9.9)    |
| "I believe that new drug therapies make people less infectious with HIV."         | Strongly agree/agree                      | 72.5             | 68.8 (60.2-77.5) | 88.0        | 77.7 (60.7-94.6) | 73.8            | 72.0 (61.3-82.7) | 88.5       | 87.9 (72.4-103.3) | 81.8              | 75.5 (66.6-84.4) | 93.2        | 93.1 (86.4-99.7) |
|                                                                                   | Disagree/Strongly disagree                | 27.5             | 31.2 (22.5-39.8) | 12.0        | 22.3 (5.4-39.3)  | 26.2            | 28.0 (17.3-38.7) | 11.5       | 12.1 (0.0-27.6)   | 18.2              | 24.5 (15.6-33.4) | 6.8         | 6.9 (0.3-13.6)   |
| <b>IV. Dimensions related to seeking care</b>                                     |                                           |                  |                  |             |                  |                 |                  |            |                   |                   |                  |             |                  |
| <b>4.1 Impact of PrEP use on sexual behavioural</b>                               |                                           |                  |                  |             |                  |                 |                  |            |                   |                   |                  |             |                  |
| "I will choose my sexual partners based on whether they are taking PrEP or not."  | Strongly agree/agree/neutral              | 36.4             | 38.2 (29.0-47.4) | 45.3        | 52.7 (34.1-71.4) | 30.1            | 35.9 (23.5-48.2) | 39.7       | 42.3 (20.3-64.3)  | 36.3              | 42.6 (31.5-53.7) | 51.1        | 49.4 (34.6-64.2) |
|                                                                                   | Disagree/strongly disagree                | 63.6             | 61.8 (52.6-71.0) | 54.7        | 47.3 (28.6-65.9) | 69.9            | 64.1 (51.8-76.5) | 60.3       | 57.7 (35.7-79.7)  | 63.7              | 57.4 (46.3-68.5) | 48.9        | 50.6 (35.8-65.4) |

|                                                                                            |                                    | Montreal (n=476) |                  |             |                   | Toronto (n=238) |                  |            |                   | Vancouver (n=386) |                  |             |                  |
|--------------------------------------------------------------------------------------------|------------------------------------|------------------|------------------|-------------|-------------------|-----------------|------------------|------------|-------------------|-------------------|------------------|-------------|------------------|
| Used PrEP in the P6M?                                                                      |                                    | No (n=368)       |                  | Yes (n=108) |                   | No (n=160)      |                  | Yes (n=78) |                   | No (n=253)        |                  | Yes (n=133) |                  |
|                                                                                            |                                    | Crude %          | RDS % (95%CI)    | Crude %     | RDS % (95%CI)     | Crude %         | RDS % (95%CI)    | Crude %    | RDS % (95%CI)     | Crude %           | RDS % (95%CI)    | Crude %     | RDS % (95%CI)    |
| "If I was taking PrEP. I would most likely stop using condoms."                            | Strongly agree/agree/neutral       | 50.3             | 48.0 (38.7-57.3) | 75.9        | 71.3 (55.8-86.7)  | 64.3            | 59.7 (47.7-71.7) | 84.4       | 77.5 (61.8-93.1)  | 59.9              | 58.9 (47.9-69.9) | 80.8        | 79.3 (68.2-90.3) |
|                                                                                            | Disagree/strongly disagree         | 49.7             | 52.0 (42.7-61.3) | 24.1        | 28.7 (13.3-44.2)  | 35.7            | 40.3 (28.3-52.3) | 15.6       | 22.5 (6.9-38.2)   | 40.1              | 41.1 (30.1-52.1) | 19.2        | 20.7 (9.7-31.8)  |
| "I am afraid that guys being on PrEP will stop using other ways of protecting themselves." | Strongly disagree/disagree/neutral | 21.7             | 23.2 (14.7-31.7) | 42.1        | 32.8 (15.4-50.2)  | 21.2            | 23.0 (13.2-32.8) | 50.0       | 42.1 (21.7-62.5)  | 21.4              | 18.2 (11.0-25.4) | 40.9        | 31.6 (17.7-45.6) |
|                                                                                            | Agree/strongly agree               | 78.3             | 76.8 (68.3-85.3) | 57.9        | 67.2 (49.8-84.6)  | 78.8            | 77.0 (67.2-86.8) | 50.0       | 57.9 (37.5-78.3)  | 78.6              | 81.8 (74.6-89.0) | 59.1        | 68.4 (54.4-82.3) |
| <b>V. Dimensions related to reaching and paying for care</b>                               |                                    |                  |                  |             |                   |                 |                  |            |                   |                   |                  |             |                  |
| <b>5.1 Access to health services</b>                                                       |                                    |                  |                  |             |                   |                 |                  |            |                   |                   |                  |             |                  |
| Has a primary healthcare provider                                                          | Yes                                | 58.4             | 49.4 (40.2-58.6) | 75.9        | 69.6 (53.8-85.3)  | 70.6            | 67.3 (55.5-79.2) | 93.6       | 85.4 (68.6-102.2) | 56.5              | 48.7 (38.0-59.4) | 78.2        | 70.7 (57.7-83.8) |
|                                                                                            | No                                 | 41.6             | 50.6 (41.4-59.8) | 24.1        | 30.4 (14.7-46.2)  | 29.4            | 32.7 (20.8-44.5) | 6.4        | 14.6 (0.0-31.4)   | 43.5              | 51.3 (40.6-62.0) | 21.8        | 29.3 (16.2-42.3) |
| Told primary healthcare provider about male partners                                       | Yes                                | 49.5             | 36.3 (27.5-45.1) | 74.1        | 63.9 (45.8-82.0)  | 56.2            | 47.7 (35.2-60.2) | 92.3       | 84.9 (68.1-101.8) | 35.6              | 20.5 (12.8-28.1) | 68.4        | 59.1 (44.6-73.5) |
|                                                                                            | No                                 | 9.0              | 13.1 (6.4-19.8)  | 1.9         | 5.7 (0.0-20.0)    | 14.4            | 19.6 (8.4-30.9)  | 1.3        | 0.5 (0.0-0.9)     | 20.9              | 28.2 (18.9-37.5) | 9.8         | 11.7 (2.1-21.3)  |
|                                                                                            | No primary care provider           | 41.6             | 50.6 (41.4-59.8) | 24.1        | 30.4 (14.7-46.2)  | 29.4            | 32.7 (20.8-44.5) | 6.4        | 14.6 (0.0-31.4)   | 43.5              | 51.3 (40.6-62.0) | 21.8        | 29.3 (16.2-42.3) |
| Has medication insurance                                                                   | Yes                                | 69.3             | 63.7 (54.7-72.8) | 92.6        | 87.9 (74.8-101.1) | 53.8            | 49.1 (36.9-61.3) | 80.8       | 74.2 (55.5-92.8)  | 67.6              | 55.2 (44.6-65.9) | 73.7        | 80.0 (65.6-94.4) |
|                                                                                            | No                                 | 30.7             | 36.3 (27.2-45.3) | 7.4         | 12.1 (0.0-25.2)   | 46.2            | 50.9 (38.7-63.1) | 19.2       | 25.8 (7.2-44.5)   | 32.4              | 44.8 (34.1-55.4) | 26.3        | 20.0 (5.6-34.4)  |
|                                                                                            |                                    |                  |                  |             |                   |                 |                  |            |                   |                   |                  |             |                  |

|                                                                                                                                    |                                        | Montreal (n=476) |                  |             |                   | Toronto (n=238) |                  |            |                   | Vancouver (n=386) |                  |             |                   |
|------------------------------------------------------------------------------------------------------------------------------------|----------------------------------------|------------------|------------------|-------------|-------------------|-----------------|------------------|------------|-------------------|-------------------|------------------|-------------|-------------------|
| Used PrEP in the P6M?                                                                                                              |                                        | No (n=368)       |                  | Yes (n=108) |                   | No (n=160)      |                  | Yes (n=78) |                   | No (n=253)        |                  | Yes (n=133) |                   |
|                                                                                                                                    |                                        | Crude %          | RDS % (95%CI)    | Crude %     | RDS % (95%CI)     | Crude %         | RDS % (95%CI)    | Crude %    | RDS % (95%CI)     | Crude %           | RDS % (95%CI)    | Crude %     | RDS % (95%CI)     |
| " I don't think I can find a doctor that is sensitive and accepting enough of my sexual activities and choices to prescribe PrEP." | Strongly disagree/<br>disagree/Neutral | 89.8             | 87.8 (82.7-93.0) | 97.2        | 96.8 (88.5-105.1) | 85.7            | 84.9 (75.5-94.4) | 94.8       | 97.7 (93.7-101.7) | 82.9              | 83.5 (74.8-92.2) | 97.7        | 98.5 (95.9-101.2) |
|                                                                                                                                    | Agree/strongly agree                   | 10.2             | 12.2 (7.0-17.3)  | 2.8         | 3.2 (0.0-11.5)    | 14.3            | 15.1 (5.6-24.5)  | 5.2        | 2.3 (0.0-6.3)     | 17.1              | 16.5 (7.8-25.2)  | 2.3         | 1.5 (0.0-4.1)     |
| "I know where to go to get a prescription for PrEP."                                                                               | Strongly agree/agree/neutral           | 67.5             | 60.8 (51.7-70.0) | 88.9        | 83.3 (69.2-97.3)  | 65.6            | 54.9 (42.0-67.7) | 92.3       | 94.0 (85.5-102.5) | 57.8              | 56.4 (45.5-67.3) | 92.4        | 82.1 (69.0-95.2)  |
|                                                                                                                                    | Disagree/strongly disagree             | 32.5             | 39.2 (30.0-48.3) | 11.1        | 16.7 (2.7-30.8)   | 34.4            | 45.1 (32.3-58.0) | 7.7        | 6.0 (0.0-14.5)    | 42.2              | 43.6 (32.7-54.5) | 7.6         | 17.9 (4.8-31.0)   |
| "I have not sought a prescription for PrEP in the past because of the cost of the medication."                                     | Strongly disagree/<br>disagree/neutral | 51.3             | 56.0 (46.7-65.4) | 64.2        | 56.6 (38.0-75.2)  | 37.8            | 41.8 (29.0-54.7) | 60.8       | 65.0 (44.9-85.0)  | 51.1              | 55.9 (44.3-67.4) | 63.8        | 65.0 (50.0-80.1)  |
|                                                                                                                                    | Agree/strongly agree                   | 48.7             | 44.0 (34.6-53.3) | 35.8        | 43.4 (24.8-62.0)  | 62.2            | 58.2 (45.3-71.0) | 39.2       | 35.0 (15.0-55.1)  | 48.9              | 44.1 (32.6-55.7) | 36.2        | 35.0 (19.9-50.0)  |
| <b>VI. Dimensions related to engaging in care</b>                                                                                  |                                        |                  |                  |             |                   |                 |                  |            |                   |                   |                  |             |                   |
| <b>6.1 Implications of ongoing PrEP use</b>                                                                                        |                                        |                  |                  |             |                   |                 |                  |            |                   |                   |                  |             |                   |
| " I am worried about the short- and long-term side effects of taking PrEP."                                                        | Strongly disagree/disagree/neutral     | 38.8             | 35.7 (26.6-44.7) | 50.9        | 52.0 (33.3-70.7)  | 44.9            | 38.8 (26.4-51.2) | 69.2       | 63.8 (44.0-83.6)  | 38.5              | 33.5 (23.4-43.5) | 61.4        | 51.9 (36.6-67.3)  |
|                                                                                                                                    | Agree/strongly agree                   | 61.2             | 64.3 (55.3-73.4) | 49.1        | 48.0 (29.3-66.7)  | 55.1            | 61.2 (48.8-73.6) | 30.8       | 36.2 (16.4-56.0)  | 61.5              | 66.5 (56.5-76.6) | 38.6        | 48.1 (32.7-63.4)  |
| " I don't like the idea of being required to go to the regular medical follow-up visits involved in taking "                       | Strongly disagree/<br>disagree/neutral | 72.7             | 70.2 (62.2-78.2) | 85.2        | 80.8 (66.0-95.7)  | 74.0            | 72.9 (62.4-83.4) | 88.5       | 92.6 (82.0-103.1) | 79.4              | 83.0 (74.5-91.5) | 93.2        | 96.7 (94.1-99.4)  |

|                                                                                                                                                    |                      |      |                  |      |                 |      |                  |      |                |      |                 |     |               |
|----------------------------------------------------------------------------------------------------------------------------------------------------|----------------------|------|------------------|------|-----------------|------|------------------|------|----------------|------|-----------------|-----|---------------|
|                                                                                                                                                    | Agree/Strongly agree | 27.3 | 29.8 (21.8-37.8) | 14.8 | 19.2 (4.3-34.0) | 26.0 | 27.1 (16.6-37.6) | 11.5 | 7.4 (0.0-18.0) | 20.6 | 17.0 (8.5-25.5) | 6.8 | 3.3 (0.6-5.9) |
| <p>* These are the factors retained for the multivariable modelling<br/> <i>RDS</i> respondent driven sampling, <i>CI</i> confidence interval.</p> |                      |      |                  |      |                 |      |                  |      |                |      |                 |     |               |

**Table S2.1: Factors\* associated with not using PrEP among self-reported HIV-negative or unknown participants for whom PrEP is clinically recommended stratified by city of recruitment and PrEP use (n=1100)**

|                                                                  |                                    | Montreal (n=476) |                        |             |                        | Toronto (n=238) |                        |            |                        | Vancouver (n=386) |                        |             |                        |
|------------------------------------------------------------------|------------------------------------|------------------|------------------------|-------------|------------------------|-----------------|------------------------|------------|------------------------|-------------------|------------------------|-------------|------------------------|
| Used PrEP in the P6M?                                            |                                    | No (n=368)       |                        | Yes (n=108) |                        | No (n=160)      |                        | Yes (n=78) |                        | No (n=253)        |                        | Yes (n=133) |                        |
|                                                                  |                                    | Crude %          | RDS adjusted % (95%CI) | Crude %     | RDS adjusted % (95%CI) | Crude %         | RDS adjusted % (95%CI) | Crude %    | RDS adjusted % (95%CI) | Crude %           | RDS adjusted % (95%CI) | Crude %     | RDS adjusted % (95%CI) |
| <b>I. Sociodemographic characteristics</b>                       |                                    |                  |                        |             |                        |                 |                        |            |                        |                   |                        |             |                        |
| <b>Age</b>                                                       | 30 years or older                  | 50.0             | 43.4 (34.1-52.7)       | 67.6        | 55.2 (37.0-73.5)       | 40.6            | 38.6 (26.8-50.4)       | 70.5       | 53.5 (32.3-74.7)       | 43.5              | 34.0 (24.3-43.6)       | 64.7        | 60.8 (46.4-75.1)       |
|                                                                  | Less than 30 years                 | 50.0             | 56.6 (47.3-65.9)       | 32.4        | 44.8 (26.5-63.0)       | 59.4            | 61.4 (49.6-73.2)       | 29.5       | 46.5 (25.3-67.7)       | 56.5              | 66.0 (56.4-75.7)       | 35.3        | 39.2 (24.9-53.6)       |
| <b>Education</b>                                                 | Greater than highschool            | 87.8             | 87.1 (81.8-92.3)       | 86.1        | 90.5 (80.0-101.0)      | 89.4            | 85.2 (77.3-93.2)       | 96.2       | 99.0 (98.1-100.0)      | 89.3              | 91.8 (87.2-96.4)       | 92.5        | 92.8 (86.0-99.5)       |
|                                                                  | No more than high school           | 12.2             | 12.9 (7.7-18.2)        | 13.9        | 9.5 (0.0-20.0)         | 10.6            | 14.8 (6.8-22.7)        | 3.8        | 1.0 (0.0-1.9)          | 10.7              | 8.2 (3.6-12.8)         | 7.5         | 7.2 (0.5-14.0)         |
| <b>Income</b>                                                    | 30 000 CAD or more                 | 45.4             | 33.4 (25.5-41.4)       | 58.3        | 42.7 (24.8-60.7)       | 53.1            | 49.3 (36.8-61.8)       | 67.9       | 55.2 (33.5-76.9)       | 58.1              | 42.9 (32.2-53.5)       | 63.9        | 57.6 (42.2-73.0)       |
|                                                                  | <30 000 CAD                        | 54.6             | 66.6 (58.6-74.5)       | 41.7        | 57.3 (39.3-75.2)       | 46.9            | 50.7 (38.2-63.2)       | 32.1       | 44.8 (23.1-66.5)       | 41.9              | 57.1 (46.5-67.8)       | 36.1        | 42.4 (27.0-57.8)       |
| <b>In a relationship with a main partner</b>                     | No                                 | 50.3             | 45.1 (36.0-54.1)       | 60.2        | 60.8 (41.7-79.9)       | 44.4            | 38.6 (27.0-50.2)       | 52.6       | 58.4 (39.2-77.6)       | 50.6              | 41.6 (31.5-51.7)       | 54.9        | 64.6 (51.2-78.1)       |
|                                                                  | Yes                                | 49.7             | 54.9 (45.9-64.0)       | 39.8        | 39.2 (20.1-58.3)       | 55.6            | 61.4 (49.8-73.0)       | 47.4       | 41.6 (22.4-60.8)       | 49.4              | 58.4 (48.3-68.5)       | 45.1        | 35.4 (21.9-48.8)       |
| <b>II. Sexual behavioural characteristics</b>                    |                                    |                  |                        |             |                        |                 |                        |            |                        |                   |                        |             |                        |
| <b>Viral load sorting as HIV prevention strategy</b>             | No                                 | 83.2             | 81.9 (74.6-89.3)       | 62.0        | 67.0 (49.1-84.8)       | 81.2            | 86.4 (77.2-95.5)       | 57.7       | 63.3 (48.2-78.4)       | 81.4              | 92.5 (88.0-96.9)       | 55.6        | 70.2 (56.8-83.6)       |
|                                                                  | Yes                                | 16.8             | 18.1 (10.7-25.4)       | 38.0        | 33.0 (15.2-50.9)       | 18.8            | 13.6 (4.5-22.8)        | 42.3       | 36.7 (21.6-51.8)       | 18.6              | 7.5 (3.1-12.0)         | 44.4        | 29.8 (16.4-43.2)       |
| <b>III. Dimensions related to perceiving the need for care</b>   |                                    |                  |                        |             |                        |                 |                        |            |                        |                   |                        |             |                        |
| <b>3.1 Perceived risk of HIV infection</b>                       |                                    |                  |                        |             |                        |                 |                        |            |                        |                   |                        |             |                        |
| <b>"I don't feel that I am at high enough risk to use PrEP."</b> | Strongly disagree/disagree/neutral | 54.4             | 56.0 (46.9-65.1)       | 88.0        | 80.9 (62.6-99.3)       | 54.1            | 50.2 (37.9-62.4)       | 98.7       | 99.6 (99.2-100.0)      | 56.9              | 50.7 (39.8-61.6)       | 90.8        | 92.1 (84.0-100.0)      |
|                                                                  | Agree/strongly agree               | 45.6             | 44.0 (34.9-53.1)       | 12.0        | 19.1 (0.7-37.4)        | 45.9            | 49.8 (37.6-62.1)       | 1.3        | 0.4 (0.0-0.8)          | 43.1              | 49.3 (38.4-60.2)       | 9.2         | 7.9 (0.0-16.0)         |

|                                                                                   |                                           | Montreal (n=476) |                  |             |                  | Toronto (n=238) |                  |            |                   | Vancouver (n=386) |                  |             |                  |
|-----------------------------------------------------------------------------------|-------------------------------------------|------------------|------------------|-------------|------------------|-----------------|------------------|------------|-------------------|-------------------|------------------|-------------|------------------|
| Used PrEP in the P6M?                                                             |                                           | No (n=368)       |                  | Yes (n=108) |                  | No (n=160)      |                  | Yes (n=78) |                   | No (n=253)        |                  | Yes (n=133) |                  |
|                                                                                   |                                           | Crude %          | RDS % (95%CI)    | Crude %     | RDS % (95%CI)    | Crude %         | RDS % (95%CI)    | Crude %    | RDS % (95%CI)     | Crude %           | RDS % (95%CI)    | Crude %     | RDS % (95%CI)    |
| "HIV/AIDS is a less serious threat than it used to be because of new treatments." | Strongly agree/agree                      | 50.1             | 49.6 (40.4-58.8) | 60.2        | 62.6 (45.2-80.1) | 67.5            | 70.4 (60.3-80.6) | 80.8       | 82.4 (71.2-93.7)  | 72.7              | 59.2 (48.1-70.2) | 82.7        | 73.6 (61.4-85.7) |
|                                                                                   | Disagree/strongly disagree                | 49.9             | 50.4 (41.2-59.6) | 39.8        | 37.4 (19.9-54.8) | 32.5            | 29.6 (19.4-39.7) | 19.2       | 17.6 (6.3-28.8)   | 27.3              | 40.8 (29.8-51.9) | 17.3        | 26.4 (14.3-38.6) |
| <b>3.2 Knowledge about PrEP</b>                                                   |                                           |                  |                  |             |                  |                 |                  |            |                   |                   |                  |             |                  |
| "I know enough about PrEP to tell if it's right for me or not."                   | Strongly agree/agree/neutral              | 69.6             | 63.2 (53.7-72.6) | 79.6        | 89.3 (81.9-96.7) | 72.2            | 75.9 (65.1-86.8) | 85.9       | 81.8 (63.8-99.8)  | 71.7              | 75.5 (67.0-84.1) | 84.0        | 86.4 (79.0-93.8) |
|                                                                                   | Disagree/strongly disagree                | 30.4             | 36.8 (27.4-46.3) | 20.4        | 10.7 (3.3-18.1)  | 27.8            | 24.1 (13.2-34.9) | 14.1       | 18.2 (0.2-36.2)   | 28.3              | 24.5 (15.9-33.0) | 16.0        | 13.6 (6.2-21.0)  |
| "In your opinion, how effective is PrEP at preventing HIV infection?"             | Completely/very                           | 65.8             | 44.4 (35.3-53.6) | 91.7        | 82.3 (69.1-95.5) | 77.5            | 69.8 (57.9-81.7) | 98.7       | 98.8 (95.0-102.7) | 73.9              | 62.3 (52.0-72.7) | 95.5        | 95.0 (90.1-99.9) |
|                                                                                   | Moderately/a little/not at all/no opinion | 34.2             | 55.6 (46.4-64.7) | 8.3         | 17.7 (4.5-30.9)  | 22.5            | 30.2 (18.3-42.1) | 1.3        | 1.2 (0.0-5.0)     | 26.1              | 37.7 (27.3-48.0) | 4.5         | 5.0 (0.1-9.9)    |
| "I believe that new drug therapies make people less infectious with HIV."         | Strongly agree/agree                      | 72.5             | 68.8 (60.2-77.5) | 88.0        | 77.7 (60.7-94.6) | 73.8            | 72.0 (61.3-82.7) | 88.5       | 87.9 (72.4-103.3) | 81.8              | 75.5 (66.6-84.4) | 93.2        | 93.1 (86.4-99.7) |
|                                                                                   | Disagree/Strongly disagree                | 27.5             | 31.2 (22.5-39.8) | 12.0        | 22.3 (5.4-39.3)  | 26.2            | 28.0 (17.3-38.7) | 11.5       | 12.1 (0.0-27.6)   | 18.2              | 24.5 (15.6-33.4) | 6.8         | 6.9 (0.3-13.6)   |
| <b>IV. Dimensions related to seeking care</b>                                     |                                           |                  |                  |             |                  |                 |                  |            |                   |                   |                  |             |                  |
| <b>4.1 Impact of PrEP use on sexual behavioural</b>                               |                                           |                  |                  |             |                  |                 |                  |            |                   |                   |                  |             |                  |
| "I will choose my sexual partners based on whether they are taking PrEP or not."  | Strongly agree/agree/neutral              | 36.4             | 38.2 (29.0-47.4) | 45.3        | 52.7 (34.1-71.4) | 30.1            | 35.9 (23.5-48.2) | 39.7       | 42.3 (20.3-64.3)  | 36.3              | 42.6 (31.5-53.7) | 51.1        | 49.4 (34.6-64.2) |
|                                                                                   | Disagree/strongly disagree                | 63.6             | 61.8 (52.6-71.0) | 54.7        | 47.3 (28.6-65.9) | 69.9            | 64.1 (51.8-76.5) | 60.3       | 57.7 (35.7-79.7)  | 63.7              | 57.4 (46.3-68.5) | 48.9        | 50.6 (35.8-65.4) |



|                                                                                            |                                    | Montreal (n=476) |                  |             |                   | Toronto (n=238) |                  |            |                   | Vancouver (n=386) |                  |             |                  |
|--------------------------------------------------------------------------------------------|------------------------------------|------------------|------------------|-------------|-------------------|-----------------|------------------|------------|-------------------|-------------------|------------------|-------------|------------------|
| Used PrEP in the P6M?                                                                      |                                    | No (n=368)       |                  | Yes (n=108) |                   | No (n=160)      |                  | Yes (n=78) |                   | No (n=253)        |                  | Yes (n=133) |                  |
|                                                                                            |                                    | Crude %          | RDS % (95%CI)    | Crude %     | RDS % (95%CI)     | Crude %         | RDS % (95%CI)    | Crude %    | RDS % (95%CI)     | Crude %           | RDS % (95%CI)    | Crude %     | RDS % (95%CI)    |
| "If I was taking PrEP. I would most likely stop using condoms."                            | Strongly agree/agree/neutral       | 50.3             | 48.0 (38.7-57.3) | 75.9        | 71.3 (55.8-86.7)  | 64.3            | 59.7 (47.7-71.7) | 84.4       | 77.5 (61.8-93.1)  | 59.9              | 58.9 (47.9-69.9) | 80.8        | 79.3 (68.2-90.3) |
|                                                                                            | Disagree/strongly disagree         | 49.7             | 52.0 (42.7-61.3) | 24.1        | 28.7 (13.3-44.2)  | 35.7            | 40.3 (28.3-52.3) | 15.6       | 22.5 (6.9-38.2)   | 40.1              | 41.1 (30.1-52.1) | 19.2        | 20.7 (9.7-31.8)  |
| "I am afraid that guys being on PrEP will stop using other ways of protecting themselves." | Strongly disagree/disagree/neutral | 21.7             | 23.2 (14.7-31.7) | 42.1        | 32.8 (15.4-50.2)  | 21.2            | 23.0 (13.2-32.8) | 50.0       | 42.1 (21.7-62.5)  | 21.4              | 18.2 (11.0-25.4) | 40.9        | 31.6 (17.7-45.6) |
|                                                                                            | Agree/strongly agree               | 78.3             | 76.8 (68.3-85.3) | 57.9        | 67.2 (49.8-84.6)  | 78.8            | 77.0 (67.2-86.8) | 50.0       | 57.9 (37.5-78.3)  | 78.6              | 81.8 (74.6-89.0) | 59.1        | 68.4 (54.4-82.3) |
| <b>V. Dimensions related to reaching and paying for care</b>                               |                                    |                  |                  |             |                   |                 |                  |            |                   |                   |                  |             |                  |
| <b>5.1 Access to health services</b>                                                       |                                    |                  |                  |             |                   |                 |                  |            |                   |                   |                  |             |                  |
| Has a primary healthcare provider                                                          | Yes                                | 58.4             | 49.4 (40.2-58.6) | 75.9        | 69.6 (53.8-85.3)  | 70.6            | 67.3 (55.5-79.2) | 93.6       | 85.4 (68.6-102.2) | 56.5              | 48.7 (38.0-59.4) | 78.2        | 70.7 (57.7-83.8) |
|                                                                                            | No                                 | 41.6             | 50.6 (41.4-59.8) | 24.1        | 30.4 (14.7-46.2)  | 29.4            | 32.7 (20.8-44.5) | 6.4        | 14.6 (0.0-31.4)   | 43.5              | 51.3 (40.6-62.0) | 21.8        | 29.3 (16.2-42.3) |
| Told primary healthcare provider about male partners                                       | Yes                                | 49.5             | 36.3 (27.5-45.1) | 74.1        | 63.9 (45.8-82.0)  | 56.2            | 47.7 (35.2-60.2) | 92.3       | 84.9 (68.1-101.8) | 35.6              | 20.5 (12.8-28.1) | 68.4        | 59.1 (44.6-73.5) |
|                                                                                            | No                                 | 9.0              | 13.1 (6.4-19.8)  | 1.9         | 5.7 (0.0-20.0)    | 14.4            | 19.6 (8.4-30.9)  | 1.3        | 0.5 (0.0-0.9)     | 20.9              | 28.2 (18.9-37.5) | 9.8         | 11.7 (2.1-21.3)  |
|                                                                                            | No primary care provider           | 41.6             | 50.6 (41.4-59.8) | 24.1        | 30.4 (14.7-46.2)  | 29.4            | 32.7 (20.8-44.5) | 6.4        | 14.6 (0.0-31.4)   | 43.5              | 51.3 (40.6-62.0) | 21.8        | 29.3 (16.2-42.3) |
| Has medication insurance                                                                   | Yes                                | 69.3             | 63.7 (54.7-72.8) | 92.6        | 87.9 (74.8-101.1) | 53.8            | 49.1 (36.9-61.3) | 80.8       | 74.2 (55.5-92.8)  | 67.6              | 55.2 (44.6-65.9) | 73.7        | 80.0 (65.6-94.4) |
|                                                                                            | No                                 | 30.7             | 36.3 (27.2-45.3) | 7.4         | 12.1 (0.0-25.2)   | 46.2            | 50.9 (38.7-63.1) | 19.2       | 25.8 (7.2-44.5)   | 32.4              | 44.8 (34.1-55.4) | 26.3        | 20.0 (5.6-34.4)  |
|                                                                                            |                                    |                  |                  |             |                   |                 |                  |            |                   |                   |                  |             |                  |

|                                                                                                                                    |                                        | Montreal (n=476) |                  |             |                   | Toronto (n=238) |                  |            |                   | Vancouver (n=386) |                  |             |                   |
|------------------------------------------------------------------------------------------------------------------------------------|----------------------------------------|------------------|------------------|-------------|-------------------|-----------------|------------------|------------|-------------------|-------------------|------------------|-------------|-------------------|
| Used PrEP in the P6M?                                                                                                              |                                        | No (n=368)       |                  | Yes (n=108) |                   | No (n=160)      |                  | Yes (n=78) |                   | No (n=253)        |                  | Yes (n=133) |                   |
|                                                                                                                                    |                                        | Crude %          | RDS % (95%CI)    | Crude %     | RDS % (95%CI)     | Crude %         | RDS % (95%CI)    | Crude %    | RDS % (95%CI)     | Crude %           | RDS % (95%CI)    | Crude %     | RDS % (95%CI)     |
| " I don't think I can find a doctor that is sensitive and accepting enough of my sexual activities and choices to prescribe PrEP." | Strongly disagree/<br>disagree/Neutral | 89.8             | 87.8 (82.7-93.0) | 97.2        | 96.8 (88.5-105.1) | 85.7            | 84.9 (75.5-94.4) | 94.8       | 97.7 (93.7-101.7) | 82.9              | 83.5 (74.8-92.2) | 97.7        | 98.5 (95.9-101.2) |
|                                                                                                                                    | Agree/strongly agree                   | 10.2             | 12.2 (7.0-17.3)  | 2.8         | 3.2 (0.0-11.5)    | 14.3            | 15.1 (5.6-24.5)  | 5.2        | 2.3 (0.0-6.3)     | 17.1              | 16.5 (7.8-25.2)  | 2.3         | 1.5 (0.0-4.1)     |
| "I know where to go to get a prescription for PrEP."                                                                               | Strongly agree/agree/neutral           | 67.5             | 60.8 (51.7-70.0) | 88.9        | 83.3 (69.2-97.3)  | 65.6            | 54.9 (42.0-67.7) | 92.3       | 94.0 (85.5-102.5) | 57.8              | 56.4 (45.5-67.3) | 92.4        | 82.1 (69.0-95.2)  |
|                                                                                                                                    | Disagree/strongly disagree             | 32.5             | 39.2 (30.0-48.3) | 11.1        | 16.7 (2.7-30.8)   | 34.4            | 45.1 (32.3-58.0) | 7.7        | 6.0 (0.0-14.5)    | 42.2              | 43.6 (32.7-54.5) | 7.6         | 17.9 (4.8-31.0)   |
| "I have not sought a prescription for PrEP in the past because of the cost of the medication."                                     | Strongly disagree/<br>disagree/neutral | 51.3             | 56.0 (46.7-65.4) | 64.2        | 56.6 (38.0-75.2)  | 37.8            | 41.8 (29.0-54.7) | 60.8       | 65.0 (44.9-85.0)  | 51.1              | 55.9 (44.3-67.4) | 63.8        | 65.0 (50.0-80.1)  |
|                                                                                                                                    | Agree/strongly agree                   | 48.7             | 44.0 (34.6-53.3) | 35.8        | 43.4 (24.8-62.0)  | 62.2            | 58.2 (45.3-71.0) | 39.2       | 35.0 (15.0-55.1)  | 48.9              | 44.1 (32.6-55.7) | 36.2        | 35.0 (19.9-50.0)  |
| <b>VI. Dimensions related to engaging in care</b>                                                                                  |                                        |                  |                  |             |                   |                 |                  |            |                   |                   |                  |             |                   |
| <b>6.1 Implications of ongoing PrEP use</b>                                                                                        |                                        |                  |                  |             |                   |                 |                  |            |                   |                   |                  |             |                   |
| " I am worried about the short- and long-term side effects of taking PrEP."                                                        | Strongly disagree/disagree/neutral     | 38.8             | 35.7 (26.6-44.7) | 50.9        | 52.0 (33.3-70.7)  | 44.9            | 38.8 (26.4-51.2) | 69.2       | 63.8 (44.0-83.6)  | 38.5              | 33.5 (23.4-43.5) | 61.4        | 51.9 (36.6-67.3)  |
|                                                                                                                                    | Agree/strongly agree                   | 61.2             | 64.3 (55.3-73.4) | 49.1        | 48.0 (29.3-66.7)  | 55.1            | 61.2 (48.8-73.6) | 30.8       | 36.2 (16.4-56.0)  | 61.5              | 66.5 (56.5-76.6) | 38.6        | 48.1 (32.7-63.4)  |
| " I don't like the idea of being required to go to the regular medical follow-up visits involved in taking "                       | Strongly disagree/<br>disagree/neutral | 72.7             | 70.2 (62.2-78.2) | 85.2        | 80.8 (66.0-95.7)  | 74.0            | 72.9 (62.4-83.4) | 88.5       | 92.6 (82.0-103.1) | 79.4              | 83.0 (74.5-91.5) | 93.2        | 96.7 (94.1-99.4)  |

|                                                                                                                                                    |                      |      |                  |      |                 |      |                  |      |                |      |                 |     |               |
|----------------------------------------------------------------------------------------------------------------------------------------------------|----------------------|------|------------------|------|-----------------|------|------------------|------|----------------|------|-----------------|-----|---------------|
|                                                                                                                                                    | Agree/Strongly agree | 27.3 | 29.8 (21.8-37.8) | 14.8 | 19.2 (4.3-34.0) | 26.0 | 27.1 (16.6-37.6) | 11.5 | 7.4 (0.0-18.0) | 20.6 | 17.0 (8.5-25.5) | 6.8 | 3.3 (0.6-5.9) |
| <p>* These are the factors retained for the multivariable modelling<br/> <i>RDS</i> respondent driven sampling, <i>CI</i> confidence interval.</p> |                      |      |                  |      |                 |      |                  |      |                |      |                 |     |               |

**Table S2.1: Factors\* associated with not using PrEP among self-reported HIV-negative or unknown participants for whom PrEP is clinically recommended stratified by city of recruitment and PrEP use (n=1100)**

|                                                                  |                                    | Montreal (n=476) |                        |             |                        | Toronto (n=238) |                        |            |                        | Vancouver (n=386) |                        |             |                        |
|------------------------------------------------------------------|------------------------------------|------------------|------------------------|-------------|------------------------|-----------------|------------------------|------------|------------------------|-------------------|------------------------|-------------|------------------------|
| Used PrEP in the P6M?                                            |                                    | No (n=368)       |                        | Yes (n=108) |                        | No (n=160)      |                        | Yes (n=78) |                        | No (n=253)        |                        | Yes (n=133) |                        |
|                                                                  |                                    | Crude %          | RDS adjusted % (95%CI) | Crude %     | RDS adjusted % (95%CI) | Crude %         | RDS adjusted % (95%CI) | Crude %    | RDS adjusted % (95%CI) | Crude %           | RDS adjusted % (95%CI) | Crude %     | RDS adjusted % (95%CI) |
| <b>I. Sociodemographic characteristics</b>                       |                                    |                  |                        |             |                        |                 |                        |            |                        |                   |                        |             |                        |
| <b>Age</b>                                                       | 30 years or older                  | 50.0             | 43.4 (34.1-52.7)       | 67.6        | 55.2 (37.0-73.5)       | 40.6            | 38.6 (26.8-50.4)       | 70.5       | 53.5 (32.3-74.7)       | 43.5              | 34.0 (24.3-43.6)       | 64.7        | 60.8 (46.4-75.1)       |
|                                                                  | Less than 30 years                 | 50.0             | 56.6 (47.3-65.9)       | 32.4        | 44.8 (26.5-63.0)       | 59.4            | 61.4 (49.6-73.2)       | 29.5       | 46.5 (25.3-67.7)       | 56.5              | 66.0 (56.4-75.7)       | 35.3        | 39.2 (24.9-53.6)       |
| <b>Education</b>                                                 | Greater than highschool            | 87.8             | 87.1 (81.8-92.3)       | 86.1        | 90.5 (80.0-101.0)      | 89.4            | 85.2 (77.3-93.2)       | 96.2       | 99.0 (98.1-100.0)      | 89.3              | 91.8 (87.2-96.4)       | 92.5        | 92.8 (86.0-99.5)       |
|                                                                  | No more than high school           | 12.2             | 12.9 (7.7-18.2)        | 13.9        | 9.5 (0.0-20.0)         | 10.6            | 14.8 (6.8-22.7)        | 3.8        | 1.0 (0.0-1.9)          | 10.7              | 8.2 (3.6-12.8)         | 7.5         | 7.2 (0.5-14.0)         |
| <b>Income</b>                                                    | 30 000 CAD or more                 | 45.4             | 33.4 (25.5-41.4)       | 58.3        | 42.7 (24.8-60.7)       | 53.1            | 49.3 (36.8-61.8)       | 67.9       | 55.2 (33.5-76.9)       | 58.1              | 42.9 (32.2-53.5)       | 63.9        | 57.6 (42.2-73.0)       |
|                                                                  | <30 000 CAD                        | 54.6             | 66.6 (58.6-74.5)       | 41.7        | 57.3 (39.3-75.2)       | 46.9            | 50.7 (38.2-63.2)       | 32.1       | 44.8 (23.1-66.5)       | 41.9              | 57.1 (46.5-67.8)       | 36.1        | 42.4 (27.0-57.8)       |
| <b>In a relationship with a main partner</b>                     | No                                 | 50.3             | 45.1 (36.0-54.1)       | 60.2        | 60.8 (41.7-79.9)       | 44.4            | 38.6 (27.0-50.2)       | 52.6       | 58.4 (39.2-77.6)       | 50.6              | 41.6 (31.5-51.7)       | 54.9        | 64.6 (51.2-78.1)       |
|                                                                  | Yes                                | 49.7             | 54.9 (45.9-64.0)       | 39.8        | 39.2 (20.1-58.3)       | 55.6            | 61.4 (49.8-73.0)       | 47.4       | 41.6 (22.4-60.8)       | 49.4              | 58.4 (48.3-68.5)       | 45.1        | 35.4 (21.9-48.8)       |
| <b>II. Sexual behavioural characteristics</b>                    |                                    |                  |                        |             |                        |                 |                        |            |                        |                   |                        |             |                        |
| <b>Viral load sorting as HIV prevention strategy</b>             | No                                 | 83.2             | 81.9 (74.6-89.3)       | 62.0        | 67.0 (49.1-84.8)       | 81.2            | 86.4 (77.2-95.5)       | 57.7       | 63.3 (48.2-78.4)       | 81.4              | 92.5 (88.0-96.9)       | 55.6        | 70.2 (56.8-83.6)       |
|                                                                  | Yes                                | 16.8             | 18.1 (10.7-25.4)       | 38.0        | 33.0 (15.2-50.9)       | 18.8            | 13.6 (4.5-22.8)        | 42.3       | 36.7 (21.6-51.8)       | 18.6              | 7.5 (3.1-12.0)         | 44.4        | 29.8 (16.4-43.2)       |
| <b>III. Dimensions related to perceiving the need for care</b>   |                                    |                  |                        |             |                        |                 |                        |            |                        |                   |                        |             |                        |
| <b>3.1 Perceived risk of HIV infection</b>                       |                                    |                  |                        |             |                        |                 |                        |            |                        |                   |                        |             |                        |
| <b>"I don't feel that I am at high enough risk to use PrEP."</b> | Strongly disagree/disagree/neutral | 54.4             | 56.0 (46.9-65.1)       | 88.0        | 80.9 (62.6-99.3)       | 54.1            | 50.2 (37.9-62.4)       | 98.7       | 99.6 (99.2-100.0)      | 56.9              | 50.7 (39.8-61.6)       | 90.8        | 92.1 (84.0-100.0)      |
|                                                                  | Agree/strongly agree               | 45.6             | 44.0 (34.9-53.1)       | 12.0        | 19.1 (0.7-37.4)        | 45.9            | 49.8 (37.6-62.1)       | 1.3        | 0.4 (0.0-0.8)          | 43.1              | 49.3 (38.4-60.2)       | 9.2         | 7.9 (0.0-16.0)         |

|                                                                                   |                                           | Montreal (n=476) |                  |             |                  | Toronto (n=238) |                  |            |                   | Vancouver (n=386) |                  |             |                  |
|-----------------------------------------------------------------------------------|-------------------------------------------|------------------|------------------|-------------|------------------|-----------------|------------------|------------|-------------------|-------------------|------------------|-------------|------------------|
| Used PrEP in the P6M?                                                             |                                           | No (n=368)       |                  | Yes (n=108) |                  | No (n=160)      |                  | Yes (n=78) |                   | No (n=253)        |                  | Yes (n=133) |                  |
|                                                                                   |                                           | Crude %          | RDS % (95%CI)    | Crude %     | RDS % (95%CI)    | Crude %         | RDS % (95%CI)    | Crude %    | RDS % (95%CI)     | Crude %           | RDS % (95%CI)    | Crude %     | RDS % (95%CI)    |
| "HIV/AIDS is a less serious threat than it used to be because of new treatments." | Strongly agree/agree                      | 50.1             | 49.6 (40.4-58.8) | 60.2        | 62.6 (45.2-80.1) | 67.5            | 70.4 (60.3-80.6) | 80.8       | 82.4 (71.2-93.7)  | 72.7              | 59.2 (48.1-70.2) | 82.7        | 73.6 (61.4-85.7) |
|                                                                                   | Disagree/strongly disagree                | 49.9             | 50.4 (41.2-59.6) | 39.8        | 37.4 (19.9-54.8) | 32.5            | 29.6 (19.4-39.7) | 19.2       | 17.6 (6.3-28.8)   | 27.3              | 40.8 (29.8-51.9) | 17.3        | 26.4 (14.3-38.6) |
| <b>3.2 Knowledge about PrEP</b>                                                   |                                           |                  |                  |             |                  |                 |                  |            |                   |                   |                  |             |                  |
| "I know enough about PrEP to tell if it's right for me or not."                   | Strongly agree/agree/neutral              | 69.6             | 63.2 (53.7-72.6) | 79.6        | 89.3 (81.9-96.7) | 72.2            | 75.9 (65.1-86.8) | 85.9       | 81.8 (63.8-99.8)  | 71.7              | 75.5 (67.0-84.1) | 84.0        | 86.4 (79.0-93.8) |
|                                                                                   | Disagree/strongly disagree                | 30.4             | 36.8 (27.4-46.3) | 20.4        | 10.7 (3.3-18.1)  | 27.8            | 24.1 (13.2-34.9) | 14.1       | 18.2 (0.2-36.2)   | 28.3              | 24.5 (15.9-33.0) | 16.0        | 13.6 (6.2-21.0)  |
| "In your opinion, how effective is PrEP at preventing HIV infection?"             | Completely/very                           | 65.8             | 44.4 (35.3-53.6) | 91.7        | 82.3 (69.1-95.5) | 77.5            | 69.8 (57.9-81.7) | 98.7       | 98.8 (95.0-102.7) | 73.9              | 62.3 (52.0-72.7) | 95.5        | 95.0 (90.1-99.9) |
|                                                                                   | Moderately/a little/not at all/no opinion | 34.2             | 55.6 (46.4-64.7) | 8.3         | 17.7 (4.5-30.9)  | 22.5            | 30.2 (18.3-42.1) | 1.3        | 1.2 (0.0-5.0)     | 26.1              | 37.7 (27.3-48.0) | 4.5         | 5.0 (0.1-9.9)    |
| "I believe that new drug therapies make people less infectious with HIV."         | Strongly agree/agree                      | 72.5             | 68.8 (60.2-77.5) | 88.0        | 77.7 (60.7-94.6) | 73.8            | 72.0 (61.3-82.7) | 88.5       | 87.9 (72.4-103.3) | 81.8              | 75.5 (66.6-84.4) | 93.2        | 93.1 (86.4-99.7) |
|                                                                                   | Disagree/Strongly disagree                | 27.5             | 31.2 (22.5-39.8) | 12.0        | 22.3 (5.4-39.3)  | 26.2            | 28.0 (17.3-38.7) | 11.5       | 12.1 (0.0-27.6)   | 18.2              | 24.5 (15.6-33.4) | 6.8         | 6.9 (0.3-13.6)   |
| <b>IV. Dimensions related to seeking care</b>                                     |                                           |                  |                  |             |                  |                 |                  |            |                   |                   |                  |             |                  |
| <b>4.1 Impact of PrEP use on sexual behavioural</b>                               |                                           |                  |                  |             |                  |                 |                  |            |                   |                   |                  |             |                  |
| "I will choose my sexual partners based on whether they are taking PrEP or not."  | Strongly agree/agree/neutral              | 36.4             | 38.2 (29.0-47.4) | 45.3        | 52.7 (34.1-71.4) | 30.1            | 35.9 (23.5-48.2) | 39.7       | 42.3 (20.3-64.3)  | 36.3              | 42.6 (31.5-53.7) | 51.1        | 49.4 (34.6-64.2) |
|                                                                                   | Disagree/strongly disagree                | 63.6             | 61.8 (52.6-71.0) | 54.7        | 47.3 (28.6-65.9) | 69.9            | 64.1 (51.8-76.5) | 60.3       | 57.7 (35.7-79.7)  | 63.7              | 57.4 (46.3-68.5) | 48.9        | 50.6 (35.8-65.4) |

|                                                                                            |                                    | Montreal (n=476) |                  |             |                   | Toronto (n=238) |                  |            |                   | Vancouver (n=386) |                  |             |                  |
|--------------------------------------------------------------------------------------------|------------------------------------|------------------|------------------|-------------|-------------------|-----------------|------------------|------------|-------------------|-------------------|------------------|-------------|------------------|
| Used PrEP in the P6M?                                                                      |                                    | No (n=368)       |                  | Yes (n=108) |                   | No (n=160)      |                  | Yes (n=78) |                   | No (n=253)        |                  | Yes (n=133) |                  |
|                                                                                            |                                    | Crude %          | RDS % (95%CI)    | Crude %     | RDS % (95%CI)     | Crude %         | RDS % (95%CI)    | Crude %    | RDS % (95%CI)     | Crude %           | RDS % (95%CI)    | Crude %     | RDS % (95%CI)    |
| "If I was taking PrEP. I would most likely stop using condoms."                            | Strongly agree/agree/neutral       | 50.3             | 48.0 (38.7-57.3) | 75.9        | 71.3 (55.8-86.7)  | 64.3            | 59.7 (47.7-71.7) | 84.4       | 77.5 (61.8-93.1)  | 59.9              | 58.9 (47.9-69.9) | 80.8        | 79.3 (68.2-90.3) |
|                                                                                            | Disagree/strongly disagree         | 49.7             | 52.0 (42.7-61.3) | 24.1        | 28.7 (13.3-44.2)  | 35.7            | 40.3 (28.3-52.3) | 15.6       | 22.5 (6.9-38.2)   | 40.1              | 41.1 (30.1-52.1) | 19.2        | 20.7 (9.7-31.8)  |
| "I am afraid that guys being on PrEP will stop using other ways of protecting themselves." | Strongly disagree/disagree/neutral | 21.7             | 23.2 (14.7-31.7) | 42.1        | 32.8 (15.4-50.2)  | 21.2            | 23.0 (13.2-32.8) | 50.0       | 42.1 (21.7-62.5)  | 21.4              | 18.2 (11.0-25.4) | 40.9        | 31.6 (17.7-45.6) |
|                                                                                            | Agree/strongly agree               | 78.3             | 76.8 (68.3-85.3) | 57.9        | 67.2 (49.8-84.6)  | 78.8            | 77.0 (67.2-86.8) | 50.0       | 57.9 (37.5-78.3)  | 78.6              | 81.8 (74.6-89.0) | 59.1        | 68.4 (54.4-82.3) |
| <b>V. Dimensions related to reaching and paying for care</b>                               |                                    |                  |                  |             |                   |                 |                  |            |                   |                   |                  |             |                  |
| <b>5.1 Access to health services</b>                                                       |                                    |                  |                  |             |                   |                 |                  |            |                   |                   |                  |             |                  |
| Has a primary healthcare provider                                                          | Yes                                | 58.4             | 49.4 (40.2-58.6) | 75.9        | 69.6 (53.8-85.3)  | 70.6            | 67.3 (55.5-79.2) | 93.6       | 85.4 (68.6-102.2) | 56.5              | 48.7 (38.0-59.4) | 78.2        | 70.7 (57.7-83.8) |
|                                                                                            | No                                 | 41.6             | 50.6 (41.4-59.8) | 24.1        | 30.4 (14.7-46.2)  | 29.4            | 32.7 (20.8-44.5) | 6.4        | 14.6 (0.0-31.4)   | 43.5              | 51.3 (40.6-62.0) | 21.8        | 29.3 (16.2-42.3) |
| Told primary healthcare provider about male partners                                       | Yes                                | 49.5             | 36.3 (27.5-45.1) | 74.1        | 63.9 (45.8-82.0)  | 56.2            | 47.7 (35.2-60.2) | 92.3       | 84.9 (68.1-101.8) | 35.6              | 20.5 (12.8-28.1) | 68.4        | 59.1 (44.6-73.5) |
|                                                                                            | No                                 | 9.0              | 13.1 (6.4-19.8)  | 1.9         | 5.7 (0.0-20.0)    | 14.4            | 19.6 (8.4-30.9)  | 1.3        | 0.5 (0.0-0.9)     | 20.9              | 28.2 (18.9-37.5) | 9.8         | 11.7 (2.1-21.3)  |
|                                                                                            | No primary care provider           | 41.6             | 50.6 (41.4-59.8) | 24.1        | 30.4 (14.7-46.2)  | 29.4            | 32.7 (20.8-44.5) | 6.4        | 14.6 (0.0-31.4)   | 43.5              | 51.3 (40.6-62.0) | 21.8        | 29.3 (16.2-42.3) |
| Has medication insurance                                                                   | Yes                                | 69.3             | 63.7 (54.7-72.8) | 92.6        | 87.9 (74.8-101.1) | 53.8            | 49.1 (36.9-61.3) | 80.8       | 74.2 (55.5-92.8)  | 67.6              | 55.2 (44.6-65.9) | 73.7        | 80.0 (65.6-94.4) |
|                                                                                            | No                                 | 30.7             | 36.3 (27.2-45.3) | 7.4         | 12.1 (0.0-25.2)   | 46.2            | 50.9 (38.7-63.1) | 19.2       | 25.8 (7.2-44.5)   | 32.4              | 44.8 (34.1-55.4) | 26.3        | 20.0 (5.6-34.4)  |
|                                                                                            |                                    |                  |                  |             |                   |                 |                  |            |                   |                   |                  |             |                  |

|                                                                                                                                    |                                        | Montreal (n=476) |                  |             |                   | Toronto (n=238) |                  |            |                   | Vancouver (n=386) |                  |             |                   |
|------------------------------------------------------------------------------------------------------------------------------------|----------------------------------------|------------------|------------------|-------------|-------------------|-----------------|------------------|------------|-------------------|-------------------|------------------|-------------|-------------------|
| Used PrEP in the P6M?                                                                                                              |                                        | No (n=368)       |                  | Yes (n=108) |                   | No (n=160)      |                  | Yes (n=78) |                   | No (n=253)        |                  | Yes (n=133) |                   |
|                                                                                                                                    |                                        | Crude %          | RDS % (95%CI)    | Crude %     | RDS % (95%CI)     | Crude %         | RDS % (95%CI)    | Crude %    | RDS % (95%CI)     | Crude %           | RDS % (95%CI)    | Crude %     | RDS % (95%CI)     |
| " I don't think I can find a doctor that is sensitive and accepting enough of my sexual activities and choices to prescribe PrEP." | Strongly disagree/<br>disagree/Neutral | 89.8             | 87.8 (82.7-93.0) | 97.2        | 96.8 (88.5-105.1) | 85.7            | 84.9 (75.5-94.4) | 94.8       | 97.7 (93.7-101.7) | 82.9              | 83.5 (74.8-92.2) | 97.7        | 98.5 (95.9-101.2) |
|                                                                                                                                    | Agree/strongly agree                   | 10.2             | 12.2 (7.0-17.3)  | 2.8         | 3.2 (0.0-11.5)    | 14.3            | 15.1 (5.6-24.5)  | 5.2        | 2.3 (0.0-6.3)     | 17.1              | 16.5 (7.8-25.2)  | 2.3         | 1.5 (0.0-4.1)     |
| "I know where to go to get a prescription for PrEP."                                                                               | Strongly agree/agree/neutral           | 67.5             | 60.8 (51.7-70.0) | 88.9        | 83.3 (69.2-97.3)  | 65.6            | 54.9 (42.0-67.7) | 92.3       | 94.0 (85.5-102.5) | 57.8              | 56.4 (45.5-67.3) | 92.4        | 82.1 (69.0-95.2)  |
|                                                                                                                                    | Disagree/strongly disagree             | 32.5             | 39.2 (30.0-48.3) | 11.1        | 16.7 (2.7-30.8)   | 34.4            | 45.1 (32.3-58.0) | 7.7        | 6.0 (0.0-14.5)    | 42.2              | 43.6 (32.7-54.5) | 7.6         | 17.9 (4.8-31.0)   |
| "I have not sought a prescription for PrEP in the past because of the cost of the medication."                                     | Strongly disagree/<br>disagree/neutral | 51.3             | 56.0 (46.7-65.4) | 64.2        | 56.6 (38.0-75.2)  | 37.8            | 41.8 (29.0-54.7) | 60.8       | 65.0 (44.9-85.0)  | 51.1              | 55.9 (44.3-67.4) | 63.8        | 65.0 (50.0-80.1)  |
|                                                                                                                                    | Agree/strongly agree                   | 48.7             | 44.0 (34.6-53.3) | 35.8        | 43.4 (24.8-62.0)  | 62.2            | 58.2 (45.3-71.0) | 39.2       | 35.0 (15.0-55.1)  | 48.9              | 44.1 (32.6-55.7) | 36.2        | 35.0 (19.9-50.0)  |
| <b>VI. Dimensions related to engaging in care</b>                                                                                  |                                        |                  |                  |             |                   |                 |                  |            |                   |                   |                  |             |                   |
| <b>6.1 Implications of ongoing PrEP use</b>                                                                                        |                                        |                  |                  |             |                   |                 |                  |            |                   |                   |                  |             |                   |
| " I am worried about the short- and long-term side effects of taking PrEP."                                                        | Strongly disagree/disagree/neutral     | 38.8             | 35.7 (26.6-44.7) | 50.9        | 52.0 (33.3-70.7)  | 44.9            | 38.8 (26.4-51.2) | 69.2       | 63.8 (44.0-83.6)  | 38.5              | 33.5 (23.4-43.5) | 61.4        | 51.9 (36.6-67.3)  |
|                                                                                                                                    | Agree/strongly agree                   | 61.2             | 64.3 (55.3-73.4) | 49.1        | 48.0 (29.3-66.7)  | 55.1            | 61.2 (48.8-73.6) | 30.8       | 36.2 (16.4-56.0)  | 61.5              | 66.5 (56.5-76.6) | 38.6        | 48.1 (32.7-63.4)  |
| " I don't like the idea of being required to go to the regular medical follow-up visits involved in taking "                       | Strongly disagree/<br>disagree/neutral | 72.7             | 70.2 (62.2-78.2) | 85.2        | 80.8 (66.0-95.7)  | 74.0            | 72.9 (62.4-83.4) | 88.5       | 92.6 (82.0-103.1) | 79.4              | 83.0 (74.5-91.5) | 93.2        | 96.7 (94.1-99.4)  |

|                                                                                                                                                    |                      |      |                  |      |                 |      |                  |      |                |      |                 |     |               |
|----------------------------------------------------------------------------------------------------------------------------------------------------|----------------------|------|------------------|------|-----------------|------|------------------|------|----------------|------|-----------------|-----|---------------|
|                                                                                                                                                    | Agree/Strongly agree | 27.3 | 29.8 (21.8-37.8) | 14.8 | 19.2 (4.3-34.0) | 26.0 | 27.1 (16.6-37.6) | 11.5 | 7.4 (0.0-18.0) | 20.6 | 17.0 (8.5-25.5) | 6.8 | 3.3 (0.6-5.9) |
| <p>* These are the factors retained for the multivariable modelling<br/> <i>RDS</i> respondent driven sampling, <i>CI</i> confidence interval.</p> |                      |      |                  |      |                 |      |                  |      |                |      |                 |     |               |



**Table S2.1: Factors\* associated with not using PrEP among self-reported HIV-negative or unknown participants for whom PrEP is clinically recommended stratified by city of recruitment and PrEP use (n=1100)**

|                                                                  |                                    | Montreal (n=476) |                        |             |                        | Toronto (n=238) |                        |            |                        | Vancouver (n=386) |                        |             |                        |
|------------------------------------------------------------------|------------------------------------|------------------|------------------------|-------------|------------------------|-----------------|------------------------|------------|------------------------|-------------------|------------------------|-------------|------------------------|
| Used PrEP in the P6M?                                            |                                    | No (n=368)       |                        | Yes (n=108) |                        | No (n=160)      |                        | Yes (n=78) |                        | No (n=253)        |                        | Yes (n=133) |                        |
|                                                                  |                                    | Crude %          | RDS adjusted % (95%CI) | Crude %     | RDS adjusted % (95%CI) | Crude %         | RDS adjusted % (95%CI) | Crude %    | RDS adjusted % (95%CI) | Crude %           | RDS adjusted % (95%CI) | Crude %     | RDS adjusted % (95%CI) |
| <b>I. Sociodemographic characteristics</b>                       |                                    |                  |                        |             |                        |                 |                        |            |                        |                   |                        |             |                        |
| <b>Age</b>                                                       | 30 years or older                  | 50.0             | 43.4 (34.1-52.7)       | 67.6        | 55.2 (37.0-73.5)       | 40.6            | 38.6 (26.8-50.4)       | 70.5       | 53.5 (32.3-74.7)       | 43.5              | 34.0 (24.3-43.6)       | 64.7        | 60.8 (46.4-75.1)       |
|                                                                  | Less than 30 years                 | 50.0             | 56.6 (47.3-65.9)       | 32.4        | 44.8 (26.5-63.0)       | 59.4            | 61.4 (49.6-73.2)       | 29.5       | 46.5 (25.3-67.7)       | 56.5              | 66.0 (56.4-75.7)       | 35.3        | 39.2 (24.9-53.6)       |
| <b>Education</b>                                                 | Greater than highschool            | 87.8             | 87.1 (81.8-92.3)       | 86.1        | 90.5 (80.0-101.0)      | 89.4            | 85.2 (77.3-93.2)       | 96.2       | 99.0 (98.1-100.0)      | 89.3              | 91.8 (87.2-96.4)       | 92.5        | 92.8 (86.0-99.5)       |
|                                                                  | No more than high school           | 12.2             | 12.9 (7.7-18.2)        | 13.9        | 9.5 (0.0-20.0)         | 10.6            | 14.8 (6.8-22.7)        | 3.8        | 1.0 (0.0-1.9)          | 10.7              | 8.2 (3.6-12.8)         | 7.5         | 7.2 (0.5-14.0)         |
| <b>Income</b>                                                    | 30 000 CAD or more                 | 45.4             | 33.4 (25.5-41.4)       | 58.3        | 42.7 (24.8-60.7)       | 53.1            | 49.3 (36.8-61.8)       | 67.9       | 55.2 (33.5-76.9)       | 58.1              | 42.9 (32.2-53.5)       | 63.9        | 57.6 (42.2-73.0)       |
|                                                                  | <30 000 CAD                        | 54.6             | 66.6 (58.6-74.5)       | 41.7        | 57.3 (39.3-75.2)       | 46.9            | 50.7 (38.2-63.2)       | 32.1       | 44.8 (23.1-66.5)       | 41.9              | 57.1 (46.5-67.8)       | 36.1        | 42.4 (27.0-57.8)       |
| <b>In a relationship with a main partner</b>                     | No                                 | 50.3             | 45.1 (36.0-54.1)       | 60.2        | 60.8 (41.7-79.9)       | 44.4            | 38.6 (27.0-50.2)       | 52.6       | 58.4 (39.2-77.6)       | 50.6              | 41.6 (31.5-51.7)       | 54.9        | 64.6 (51.2-78.1)       |
|                                                                  | Yes                                | 49.7             | 54.9 (45.9-64.0)       | 39.8        | 39.2 (20.1-58.3)       | 55.6            | 61.4 (49.8-73.0)       | 47.4       | 41.6 (22.4-60.8)       | 49.4              | 58.4 (48.3-68.5)       | 45.1        | 35.4 (21.9-48.8)       |
| <b>II. Sexual behavioural characteristics</b>                    |                                    |                  |                        |             |                        |                 |                        |            |                        |                   |                        |             |                        |
| <b>Viral load sorting as HIV prevention strategy</b>             | No                                 | 83.2             | 81.9 (74.6-89.3)       | 62.0        | 67.0 (49.1-84.8)       | 81.2            | 86.4 (77.2-95.5)       | 57.7       | 63.3 (48.2-78.4)       | 81.4              | 92.5 (88.0-96.9)       | 55.6        | 70.2 (56.8-83.6)       |
|                                                                  | Yes                                | 16.8             | 18.1 (10.7-25.4)       | 38.0        | 33.0 (15.2-50.9)       | 18.8            | 13.6 (4.5-22.8)        | 42.3       | 36.7 (21.6-51.8)       | 18.6              | 7.5 (3.1-12.0)         | 44.4        | 29.8 (16.4-43.2)       |
| <b>III. Dimensions related to perceiving the need for care</b>   |                                    |                  |                        |             |                        |                 |                        |            |                        |                   |                        |             |                        |
| <b>3.1 Perceived risk of HIV infection</b>                       |                                    |                  |                        |             |                        |                 |                        |            |                        |                   |                        |             |                        |
| <b>"I don't feel that I am at high enough risk to use PrEP."</b> | Strongly disagree/disagree/neutral | 54.4             | 56.0 (46.9-65.1)       | 88.0        | 80.9 (62.6-99.3)       | 54.1            | 50.2 (37.9-62.4)       | 98.7       | 99.6 (99.2-100.0)      | 56.9              | 50.7 (39.8-61.6)       | 90.8        | 92.1 (84.0-100.0)      |
|                                                                  | Agree/strongly agree               | 45.6             | 44.0 (34.9-53.1)       | 12.0        | 19.1 (0.7-37.4)        | 45.9            | 49.8 (37.6-62.1)       | 1.3        | 0.4 (0.0-0.8)          | 43.1              | 49.3 (38.4-60.2)       | 9.2         | 7.9 (0.0-16.0)         |

|                                                                                   |                                           | Montreal (n=476) |                  |             |                  | Toronto (n=238) |                  |            |                   | Vancouver (n=386) |                  |             |                  |
|-----------------------------------------------------------------------------------|-------------------------------------------|------------------|------------------|-------------|------------------|-----------------|------------------|------------|-------------------|-------------------|------------------|-------------|------------------|
| Used PrEP in the P6M?                                                             |                                           | No (n=368)       |                  | Yes (n=108) |                  | No (n=160)      |                  | Yes (n=78) |                   | No (n=253)        |                  | Yes (n=133) |                  |
|                                                                                   |                                           | Crude %          | RDS % (95%CI)    | Crude %     | RDS % (95%CI)    | Crude %         | RDS % (95%CI)    | Crude %    | RDS % (95%CI)     | Crude %           | RDS % (95%CI)    | Crude %     | RDS % (95%CI)    |
| "HIV/AIDS is a less serious threat than it used to be because of new treatments." | Strongly agree/agree                      | 50.1             | 49.6 (40.4-58.8) | 60.2        | 62.6 (45.2-80.1) | 67.5            | 70.4 (60.3-80.6) | 80.8       | 82.4 (71.2-93.7)  | 72.7              | 59.2 (48.1-70.2) | 82.7        | 73.6 (61.4-85.7) |
|                                                                                   | Disagree/strongly disagree                | 49.9             | 50.4 (41.2-59.6) | 39.8        | 37.4 (19.9-54.8) | 32.5            | 29.6 (19.4-39.7) | 19.2       | 17.6 (6.3-28.8)   | 27.3              | 40.8 (29.8-51.9) | 17.3        | 26.4 (14.3-38.6) |
| <b>3.2 Knowledge about PrEP</b>                                                   |                                           |                  |                  |             |                  |                 |                  |            |                   |                   |                  |             |                  |
| "I know enough about PrEP to tell if it's right for me or not."                   | Strongly agree/agree/neutral              | 69.6             | 63.2 (53.7-72.6) | 79.6        | 89.3 (81.9-96.7) | 72.2            | 75.9 (65.1-86.8) | 85.9       | 81.8 (63.8-99.8)  | 71.7              | 75.5 (67.0-84.1) | 84.0        | 86.4 (79.0-93.8) |
|                                                                                   | Disagree/strongly disagree                | 30.4             | 36.8 (27.4-46.3) | 20.4        | 10.7 (3.3-18.1)  | 27.8            | 24.1 (13.2-34.9) | 14.1       | 18.2 (0.2-36.2)   | 28.3              | 24.5 (15.9-33.0) | 16.0        | 13.6 (6.2-21.0)  |
| "In your opinion, how effective is PrEP at preventing HIV infection?"             | Completely/very                           | 65.8             | 44.4 (35.3-53.6) | 91.7        | 82.3 (69.1-95.5) | 77.5            | 69.8 (57.9-81.7) | 98.7       | 98.8 (95.0-102.7) | 73.9              | 62.3 (52.0-72.7) | 95.5        | 95.0 (90.1-99.9) |
|                                                                                   | Moderately/a little/not at all/no opinion | 34.2             | 55.6 (46.4-64.7) | 8.3         | 17.7 (4.5-30.9)  | 22.5            | 30.2 (18.3-42.1) | 1.3        | 1.2 (0.0-5.0)     | 26.1              | 37.7 (27.3-48.0) | 4.5         | 5.0 (0.1-9.9)    |
| "I believe that new drug therapies make people less infectious with HIV."         | Strongly agree/agree                      | 72.5             | 68.8 (60.2-77.5) | 88.0        | 77.7 (60.7-94.6) | 73.8            | 72.0 (61.3-82.7) | 88.5       | 87.9 (72.4-103.3) | 81.8              | 75.5 (66.6-84.4) | 93.2        | 93.1 (86.4-99.7) |
|                                                                                   | Disagree/Strongly disagree                | 27.5             | 31.2 (22.5-39.8) | 12.0        | 22.3 (5.4-39.3)  | 26.2            | 28.0 (17.3-38.7) | 11.5       | 12.1 (0.0-27.6)   | 18.2              | 24.5 (15.6-33.4) | 6.8         | 6.9 (0.3-13.6)   |
| <b>IV. Dimensions related to seeking care</b>                                     |                                           |                  |                  |             |                  |                 |                  |            |                   |                   |                  |             |                  |
| <b>4.1 Impact of PrEP use on sexual behavioural</b>                               |                                           |                  |                  |             |                  |                 |                  |            |                   |                   |                  |             |                  |
| "I will choose my sexual partners based on whether they are taking PrEP or not."  | Strongly agree/agree/neutral              | 36.4             | 38.2 (29.0-47.4) | 45.3        | 52.7 (34.1-71.4) | 30.1            | 35.9 (23.5-48.2) | 39.7       | 42.3 (20.3-64.3)  | 36.3              | 42.6 (31.5-53.7) | 51.1        | 49.4 (34.6-64.2) |
|                                                                                   | Disagree/strongly disagree                | 63.6             | 61.8 (52.6-71.0) | 54.7        | 47.3 (28.6-65.9) | 69.9            | 64.1 (51.8-76.5) | 60.3       | 57.7 (35.7-79.7)  | 63.7              | 57.4 (46.3-68.5) | 48.9        | 50.6 (35.8-65.4) |

|                                                                                            |                                    | Montreal (n=476) |                  |             |                   | Toronto (n=238) |                  |            |                   | Vancouver (n=386) |                  |             |                  |
|--------------------------------------------------------------------------------------------|------------------------------------|------------------|------------------|-------------|-------------------|-----------------|------------------|------------|-------------------|-------------------|------------------|-------------|------------------|
| Used PrEP in the P6M?                                                                      |                                    | No (n=368)       |                  | Yes (n=108) |                   | No (n=160)      |                  | Yes (n=78) |                   | No (n=253)        |                  | Yes (n=133) |                  |
|                                                                                            |                                    | Crude %          | RDS % (95%CI)    | Crude %     | RDS % (95%CI)     | Crude %         | RDS % (95%CI)    | Crude %    | RDS % (95%CI)     | Crude %           | RDS % (95%CI)    | Crude %     | RDS % (95%CI)    |
| "If I was taking PrEP. I would most likely stop using condoms."                            | Strongly agree/agree/neutral       | 50.3             | 48.0 (38.7-57.3) | 75.9        | 71.3 (55.8-86.7)  | 64.3            | 59.7 (47.7-71.7) | 84.4       | 77.5 (61.8-93.1)  | 59.9              | 58.9 (47.9-69.9) | 80.8        | 79.3 (68.2-90.3) |
|                                                                                            | Disagree/strongly disagree         | 49.7             | 52.0 (42.7-61.3) | 24.1        | 28.7 (13.3-44.2)  | 35.7            | 40.3 (28.3-52.3) | 15.6       | 22.5 (6.9-38.2)   | 40.1              | 41.1 (30.1-52.1) | 19.2        | 20.7 (9.7-31.8)  |
| "I am afraid that guys being on PrEP will stop using other ways of protecting themselves." | Strongly disagree/disagree/neutral | 21.7             | 23.2 (14.7-31.7) | 42.1        | 32.8 (15.4-50.2)  | 21.2            | 23.0 (13.2-32.8) | 50.0       | 42.1 (21.7-62.5)  | 21.4              | 18.2 (11.0-25.4) | 40.9        | 31.6 (17.7-45.6) |
|                                                                                            | Agree/strongly agree               | 78.3             | 76.8 (68.3-85.3) | 57.9        | 67.2 (49.8-84.6)  | 78.8            | 77.0 (67.2-86.8) | 50.0       | 57.9 (37.5-78.3)  | 78.6              | 81.8 (74.6-89.0) | 59.1        | 68.4 (54.4-82.3) |
| <b>V. Dimensions related to reaching and paying for care</b>                               |                                    |                  |                  |             |                   |                 |                  |            |                   |                   |                  |             |                  |
| <b>5.1 Access to health services</b>                                                       |                                    |                  |                  |             |                   |                 |                  |            |                   |                   |                  |             |                  |
| Has a primary healthcare provider                                                          | Yes                                | 58.4             | 49.4 (40.2-58.6) | 75.9        | 69.6 (53.8-85.3)  | 70.6            | 67.3 (55.5-79.2) | 93.6       | 85.4 (68.6-102.2) | 56.5              | 48.7 (38.0-59.4) | 78.2        | 70.7 (57.7-83.8) |
|                                                                                            | No                                 | 41.6             | 50.6 (41.4-59.8) | 24.1        | 30.4 (14.7-46.2)  | 29.4            | 32.7 (20.8-44.5) | 6.4        | 14.6 (0.0-31.4)   | 43.5              | 51.3 (40.6-62.0) | 21.8        | 29.3 (16.2-42.3) |
| Told primary healthcare provider about male partners                                       | Yes                                | 49.5             | 36.3 (27.5-45.1) | 74.1        | 63.9 (45.8-82.0)  | 56.2            | 47.7 (35.2-60.2) | 92.3       | 84.9 (68.1-101.8) | 35.6              | 20.5 (12.8-28.1) | 68.4        | 59.1 (44.6-73.5) |
|                                                                                            | No                                 | 9.0              | 13.1 (6.4-19.8)  | 1.9         | 5.7 (0.0-20.0)    | 14.4            | 19.6 (8.4-30.9)  | 1.3        | 0.5 (0.0-0.9)     | 20.9              | 28.2 (18.9-37.5) | 9.8         | 11.7 (2.1-21.3)  |
|                                                                                            | No primary care provider           | 41.6             | 50.6 (41.4-59.8) | 24.1        | 30.4 (14.7-46.2)  | 29.4            | 32.7 (20.8-44.5) | 6.4        | 14.6 (0.0-31.4)   | 43.5              | 51.3 (40.6-62.0) | 21.8        | 29.3 (16.2-42.3) |
| Has medication insurance                                                                   | Yes                                | 69.3             | 63.7 (54.7-72.8) | 92.6        | 87.9 (74.8-101.1) | 53.8            | 49.1 (36.9-61.3) | 80.8       | 74.2 (55.5-92.8)  | 67.6              | 55.2 (44.6-65.9) | 73.7        | 80.0 (65.6-94.4) |
|                                                                                            | No                                 | 30.7             | 36.3 (27.2-45.3) | 7.4         | 12.1 (0.0-25.2)   | 46.2            | 50.9 (38.7-63.1) | 19.2       | 25.8 (7.2-44.5)   | 32.4              | 44.8 (34.1-55.4) | 26.3        | 20.0 (5.6-34.4)  |
|                                                                                            |                                    |                  |                  |             |                   |                 |                  |            |                   |                   |                  |             |                  |

|                                                                                                                                    |                                     | Montreal (n=476) |                  |             |                   | Toronto (n=238) |                  |            |                   | Vancouver (n=386) |                  |             |                   |
|------------------------------------------------------------------------------------------------------------------------------------|-------------------------------------|------------------|------------------|-------------|-------------------|-----------------|------------------|------------|-------------------|-------------------|------------------|-------------|-------------------|
| Used PrEP in the P6M?                                                                                                              |                                     | No (n=368)       |                  | Yes (n=108) |                   | No (n=160)      |                  | Yes (n=78) |                   | No (n=253)        |                  | Yes (n=133) |                   |
|                                                                                                                                    |                                     | Crude %          | RDS % (95%CI)    | Crude %     | RDS % (95%CI)     | Crude %         | RDS % (95%CI)    | Crude %    | RDS % (95%CI)     | Crude %           | RDS % (95%CI)    | Crude %     | RDS % (95%CI)     |
| " I don't think I can find a doctor that is sensitive and accepting enough of my sexual activities and choices to prescribe PrEP." | Strongly disagree/ disagree/Neutral | 89.8             | 87.8 (82.7-93.0) | 97.2        | 96.8 (88.5-105.1) | 85.7            | 84.9 (75.5-94.4) | 94.8       | 97.7 (93.7-101.7) | 82.9              | 83.5 (74.8-92.2) | 97.7        | 98.5 (95.9-101.2) |
|                                                                                                                                    | Agree/strongly agree                | 10.2             | 12.2 (7.0-17.3)  | 2.8         | 3.2 (0.0-11.5)    | 14.3            | 15.1 (5.6-24.5)  | 5.2        | 2.3 (0.0-6.3)     | 17.1              | 16.5 (7.8-25.2)  | 2.3         | 1.5 (0.0-4.1)     |
| "I know where to go to get a prescription for PrEP."                                                                               | Strongly agree/agree/neutral        | 67.5             | 60.8 (51.7-70.0) | 88.9        | 83.3 (69.2-97.3)  | 65.6            | 54.9 (42.0-67.7) | 92.3       | 94.0 (85.5-102.5) | 57.8              | 56.4 (45.5-67.3) | 92.4        | 82.1 (69.0-95.2)  |
|                                                                                                                                    | Disagree/strongly disagree          | 32.5             | 39.2 (30.0-48.3) | 11.1        | 16.7 (2.7-30.8)   | 34.4            | 45.1 (32.3-58.0) | 7.7        | 6.0 (0.0-14.5)    | 42.2              | 43.6 (32.7-54.5) | 7.6         | 17.9 (4.8-31.0)   |
| "I have not sought a prescription for PrEP in the past because of the cost of the medication."                                     | Strongly disagree/ disagree/neutral | 51.3             | 56.0 (46.7-65.4) | 64.2        | 56.6 (38.0-75.2)  | 37.8            | 41.8 (29.0-54.7) | 60.8       | 65.0 (44.9-85.0)  | 51.1              | 55.9 (44.3-67.4) | 63.8        | 65.0 (50.0-80.1)  |
|                                                                                                                                    | Agree/strongly agree                | 48.7             | 44.0 (34.6-53.3) | 35.8        | 43.4 (24.8-62.0)  | 62.2            | 58.2 (45.3-71.0) | 39.2       | 35.0 (15.0-55.1)  | 48.9              | 44.1 (32.6-55.7) | 36.2        | 35.0 (19.9-50.0)  |
| <b>VI. Dimensions related to engaging in care</b>                                                                                  |                                     |                  |                  |             |                   |                 |                  |            |                   |                   |                  |             |                   |
| <b>6.1 Implications of ongoing PrEP use</b>                                                                                        |                                     |                  |                  |             |                   |                 |                  |            |                   |                   |                  |             |                   |
| " I am worried about the short- and long-term side effects of taking PrEP."                                                        | Strongly disagree/disagree/neutral  | 38.8             | 35.7 (26.6-44.7) | 50.9        | 52.0 (33.3-70.7)  | 44.9            | 38.8 (26.4-51.2) | 69.2       | 63.8 (44.0-83.6)  | 38.5              | 33.5 (23.4-43.5) | 61.4        | 51.9 (36.6-67.3)  |
|                                                                                                                                    | Agree/strongly agree                | 61.2             | 64.3 (55.3-73.4) | 49.1        | 48.0 (29.3-66.7)  | 55.1            | 61.2 (48.8-73.6) | 30.8       | 36.2 (16.4-56.0)  | 61.5              | 66.5 (56.5-76.6) | 38.6        | 48.1 (32.7-63.4)  |
| " I don't like the idea of being required to go to the regular medical follow-up visits involved in taking "                       | Strongly disagree/ disagree/neutral | 72.7             | 70.2 (62.2-78.2) | 85.2        | 80.8 (66.0-95.7)  | 74.0            | 72.9 (62.4-83.4) | 88.5       | 92.6 (82.0-103.1) | 79.4              | 83.0 (74.5-91.5) | 93.2        | 96.7 (94.1-99.4)  |

|                                                                                                                                                    |                      |      |                  |      |                 |      |                  |      |                |      |                 |     |               |
|----------------------------------------------------------------------------------------------------------------------------------------------------|----------------------|------|------------------|------|-----------------|------|------------------|------|----------------|------|-----------------|-----|---------------|
|                                                                                                                                                    | Agree/Strongly agree | 27.3 | 29.8 (21.8-37.8) | 14.8 | 19.2 (4.3-34.0) | 26.0 | 27.1 (16.6-37.6) | 11.5 | 7.4 (0.0-18.0) | 20.6 | 17.0 (8.5-25.5) | 6.8 | 3.3 (0.6-5.9) |
| <p>* These are the factors retained for the multivariable modelling<br/> <i>RDS</i> respondent driven sampling, <i>CI</i> confidence interval.</p> |                      |      |                  |      |                 |      |                  |      |                |      |                 |     |               |

**Table S2.2: Other potential factors of not using PrEP that were also considered among self-reported HIV-negative or unknown participants for whom PrEP is clinically recommended stratified by city of recruitment and PrEP use (n=1100)**

|                                                                    |                                     | Montreal (n=476) |                        |             |                        | Toronto (n=238) |                        |            |                        | Vancouver (n=386) |                        |             |                        |
|--------------------------------------------------------------------|-------------------------------------|------------------|------------------------|-------------|------------------------|-----------------|------------------------|------------|------------------------|-------------------|------------------------|-------------|------------------------|
| Used PrEP in the P6M?                                              |                                     | No (n=368)       |                        | Yes (n=108) |                        | No (n=160)      |                        | Yes (n=78) |                        | No (n=253)        |                        | Yes (n=133) |                        |
|                                                                    |                                     | Crude %          | RDS adjusted % (95%CI) | Crude %     | RDS adjusted % (95%CI) | Crude %         | RDS adjusted % (95%CI) | Crude %    | RDS adjusted % (95%CI) | Crude %           | RDS adjusted % (95%CI) | Crude %     | RDS adjusted % (95%CI) |
| <b>I. Sociodemographic characteristics</b>                         |                                     |                  |                        |             |                        |                 |                        |            |                        |                   |                        |             |                        |
| <b>Sexual Orientation</b>                                          | Gay                                 | 89.4             | 84.8 (78.1-91.5)       | 87          | 82.9 (67.2-98.6)       | 76.2            | 81.3 (70.1-92.5)       | 93.6       | 96.6 (92.0-101.1)      | 86.6              | 90.2 (85.0-95.4)       | 88          | 88.1 (81.6-94.6)       |
|                                                                    | Other                               | 10.6             | 15.2 (8.5-21.9)        | 13          | 17.1 (1.4-32.8)        | 23.8            | 18.7 (7.5-29.9)        | 6.4        | 3.4 (0.0-8.0)          | 13.4              | 9.8 (4.6-15.0)         | 12          | 11.9 (5.4-18.4)        |
| <b>Ethnicity</b>                                                   | French Canadian or English Canadian | 55.4             | 45.9 (36.9-54.8)       | 58.3        | 54.3 (35.8-72.9)       | 41.2            | 30.7 (19.8-41.7)       | 39.7       | 38.0 (15.1-60.8)       | 47.4              | 39.5 (29.2-49.8)       | 44.4        | 39.5 (24.6-54.3)       |
|                                                                    | Other                               | 44.6             | 54.1 (45.2-63.1)       | 41.7        | 45.7 (27.1-64.2)       | 58.8            | 69.3 (58.3-80.2)       | 60.3       | 62.0 (39.2-84.9)       | 52.6              | 60.5 (50.2-70.8)       | 55.6        | 60.5 (45.7-75.4)       |
| <b>Born in Canada</b>                                              | No                                  | 38.6             | 46.4 (37.3-55.6)       | 35.2        | 42.2 (23.7-60.7)       | 38.1            | 48.8 (36.5-61.1)       | 39.7       | 52.4 (30.7-74.1)       | 35.6              | 44.5 (33.6-55.5)       | 39.8        | 44.3 (28.9-59.7)       |
|                                                                    | Yes                                 | 61.4             | 53.6 (44.4-62.7)       | 64.8        | 57.8 (39.3-76.3)       | 61.9            | 51.2 (38.9-63.5)       | 60.3       | 47.6 (25.9-69.3)       | 64.4              | 55.5 (44.5-66.4)       | 60.2        | 55.7 (40.3-71.1)       |
| <b>II. Sexual behavioural characteristics</b>                      |                                     |                  |                        |             |                        |                 |                        |            |                        |                   |                        |             |                        |
| <b>Gave or received money for sex in last 6 months</b>             | Yes                                 | 9.0              | 6.9 (2.7-11.1)         | 9.3         | 18.5 (1.5-35.4)        | 13.3            | 7.6 (1.3-13.8)         | 18.2       | 19.5 (0.1-38.8)        | 6.4               | 10.0 (3.4-16.6)        | 10.5        | 8.2 (1.9-14.6)         |
|                                                                    | No                                  | 91.0             | 93.1 (88.9-97.3)       | 90.7        | 81.5 (64.6-98.5)       | 86.7            | 92.4 (86.2-98.7)       | 81.8       | 80.5 (61.2-99.9)       | 93.6              | 90.0 (83.4-96.6)       | 89.5        | 91.8 (85.4-98.1)       |
| <b>Participated in group sex (&gt;=4 persons) in last 6 months</b> | Yes                                 | 25.8             | 20.6 (13.7-27.5)       | 44.4        | 37.3 (16.3-58.3)       | 44.6            | 30.0 (19.0-41.0)       | 59.0       | 44.2 (24.8-63.7)       | 24.7              | 17.3 (9.0-25.6)        | 42.9        | 34.1 (18.9-49.3)       |
|                                                                    | No                                  | 74.2             | 79.4 (72.5-86.3)       | 55.6        | 62.7 (41.7-83.7)       | 55.4            | 70.0 (59.0-81.0)       | 41.0       | 55.8 (36.3-75.2)       | 75.3              | 82.7 (74.4-91.0)       | 57.1        | 65.9 (50.7-81.1)       |
| <b>Sero-positioning as HIV prevention strategy</b>                 | No                                  | 70.9             | 78.7 (70.8-86.6)       | 63.9        | 63.2 (44.3-82.2)       | 62.5            | 67.1 (55.1-79.1)       | 60.3       | 64.5 (43.8-85.2)       | 62.8              | 64.0 (53.9-74.2)       | 63.2        | 76.7 (65.9-87.5)       |
|                                                                    | Yes                                 | 29.1             | 21.3 (13.4-29.2)       | 36.1        | 36.8 (17.8-55.7)       | 37.5            | 32.9 (20.9-44.9)       | 39.7       | 35.5 (14.8-56.2)       | 37.2              | 36.0 (25.8-46.1)       | 36.8        | 23.3 (12.5-34.1)       |
| <b>Sero-sorting as HIV prevention strategy</b>                     | No                                  | 36.4             | 40.8 (32.2-49.4)       | 36.1        | 37.7 (18.6-56.9)       | 34.4            | 35.0 (23.1-46.8)       | 30.8       | 30.1 (12.0-48.2)       | 34.8              | 47.5 (37.0-57.9)       | 36.8        | 42.9 (28.4-57.4)       |
|                                                                    | Yes                                 | 63.6             | 59.2 (50.6-67.8)       | 63.9        | 62.3 (43.1-81.4)       | 65.6            | 65.0 (53.2-76.9)       | 69.2       | 69.9 (51.8-88.0)       | 65.2              | 52.5 (42.1-63.0)       | 63.2        | 57.1 (42.6-71.6)       |

|                                                                                   |                                    | Montreal (n=476) |                  |             |                  | Toronto (n=238) |                  |            |                   | Vancouver (n=386) |                  |             |                   |
|-----------------------------------------------------------------------------------|------------------------------------|------------------|------------------|-------------|------------------|-----------------|------------------|------------|-------------------|-------------------|------------------|-------------|-------------------|
| Used PrEP in the P6M?                                                             |                                    | No (n=368)       |                  | Yes (n=108) |                  | No (n=160)      |                  | Yes (n=78) |                   | No (n=253)        |                  | Yes (n=133) |                   |
|                                                                                   |                                    | Crude %          | RDS % (95%CI)    | Crude %     | RDS % (95%CI)    | Crude %         | RDS % (95%CI)    | Crude %    | RDS % (95%CI)     | Crude %           | RDS % (95%CI)    | Crude %     | RDS % (95%CI)     |
| PrEP sorting as HIV prevention strategy                                           | No                                 | 64.1             | 62.6 (53.7-71.4) | 33.3        | 35.2 (17.6-52.8) | 68.8            | 73.2 (63.1-83.4) | 25.6       | 23.2 (5.5-40.9)   | 64.4              | 69.6 (59.6-79.5) | 28.6        | 37.3 (22.9-51.8)  |
|                                                                                   | Yes                                | 35.9             | 37.4 (28.6-46.3) | 66.7        | 64.8 (47.2-82.4) | 31.2            | 26.8 (16.6-36.9) | 74.4       | 76.8 (59.1-94.5)  | 35.6              | 30.4 (20.5-40.4) | 71.4        | 62.7 (48.2-77.1)  |
| Withdrawal as HIV prevention strategy                                             | No                                 | 72.3             | 64.0 (55.2-72.8) | 77.8        | 81.6 (70.1-93.1) | 69.4            | 79.0 (68.8-89.1) | 73.1       | 67.2 (48.9-85.4)  | 73.5              | 79.7 (71.1-88.3) | 75.2        | 76.2 (63.4-89.0)  |
|                                                                                   | Yes                                | 27.7             | 36.0 (27.2-44.8) | 22.2        | 18.4 (6.9-29.9)  | 30.6            | 21.0 (10.9-31.2) | 26.9       | 32.8 (14.6-51.1)  | 26.5              | 20.3 (11.7-28.9) | 24.8        | 23.8 (11.0-36.6)  |
| Sexual compulsivity scale                                                         | <2.4                               | 78.0             | 76.7 (70.0-83.3) | 72.9        | 53.5 (34.6-72.3) | 79.1            | 78.0 (68.3-87.8) | 83.3       | 82.9 (67.2-98.7)  | 86.6              | 90.4 (86.7-94.1) | 77.4        | 77.0 (65.1-88.9)  |
|                                                                                   | >=2.4                              | 22.0             | 23.3 (16.7-30.0) | 27.1        | 46.5 (27.7-65.4) | 20.9            | 22.0 (12.2-31.7) | 16.7       | 17.1 (1.3-32.8)   | 13.4              | 9.6 (5.9-13.3)   | 22.6        | 23.0 (11.1-34.9)  |
| <b>III. Dimensions related to perceiving the need for care</b>                    |                                    |                  |                  |             |                  |                 |                  |            |                   |                   |                  |             |                   |
| <b>3.1 Perceived risk of HIV infection</b>                                        |                                    |                  |                  |             |                  |                 |                  |            |                   |                   |                  |             |                   |
| "I don't feel that I am at high enough risk to use PrEP."                         | Strongly disagree/disagree/neutral | 54.4             | 56.0 (46.9-65.1) | 88.0        | 80.9 (62.6-99.3) | 54.1            | 50.2 (37.9-62.4) | 98.7       | 99.6 (99.2-100.0) | 56.9              | 50.7 (39.8-61.6) | 90.8        | 92.1 (84.0-100.0) |
|                                                                                   | Agree/strongly agree               | 45.6             | 44.0 (34.9-53.1) | 12.0        | 19.1 (0.7-37.4)  | 45.9            | 49.8 (37.6-62.1) | 1.3        | 0.4 (0.0-0.8)     | 43.1              | 49.3 (38.4-60.2) | 9.2         | 7.9 (0.0-16.0)    |
| "HIV/AIDS is a less serious threat than it used to be because of new treatments." | Strongly agree/agree               | 50.1             | 49.6 (40.4-58.8) | 60.2        | 62.6 (45.2-80.1) | 67.5            | 70.4 (60.3-80.6) | 80.8       | 82.4 (71.2-93.7)  | 72.7              | 59.2 (48.1-70.2) | 82.7        | 73.6 (61.4-85.7)  |
|                                                                                   | Disagree/strongly disagree         | 49.9             | 50.4 (41.2-59.6) | 39.8        | 37.4 (19.9-54.8) | 32.5            | 29.6 (19.4-39.7) | 19.2       | 17.6 (6.3-28.8)   | 27.3              | 40.8 (29.8-51.9) | 17.3        | 26.4 (14.3-38.6)  |
| <b>IV. Dimensions related to seeking care</b>                                     |                                    |                  |                  |             |                  |                 |                  |            |                   |                   |                  |             |                   |
| <b>4.1 Impact of PrEP use on sexual behavioural</b>                               |                                    |                  |                  |             |                  |                 |                  |            |                   |                   |                  |             |                   |
| "PrEP would allow me to have the sex I want."                                     | Strongly agree/agree/neutral       | 65.6             | 62.2 (53.4-70.9) | 92.6        | 83.8 (71.6-96.1) | 75.2            | 78.7 (68.0-89.3) | 96.2       | 94.6 (84.6-104.6) | 77.0              | 65.8 (55.2-76.4) | 91.7        | 89.2 (80.1-98.2)  |
|                                                                                   | Disagree/strongly disagree         | 34.4             | 37.8 (29.1-46.6) | 7.4         | 16.2 (3.9-28.4)  | 24.8            | 21.3 (10.7-32.0) | 3.8        | 5.4 (0.0-15.4)    | 23.0              | 34.2 (23.6-44.8) | 8.3         | 10.8 (1.8-19.9)   |
| "If I were taking PrEP. I'd talk about it with my sexual partners."               | Strongly agree/agree/neutral       | 94.2             | 93.7 (89.6-97.9) | 96.3        | 97.0 (94.5-99.5) | 98.1            | 99.1 (98.3-99.8) | 94.9       | 86.4 (70.0-102.8) | 96.8              | 92.8 (89.5-96.1) | 99.2        | 98.0 (97.1-98.9)  |
|                                                                                   | Disagree/strongly disagree         | 5.8              | 6.3 (2.1-10.4)   | 3.7         | 3.0 (0.5-5.5)    | 1.9             | 0.9 (0.2-1.7)    | 5.1        | 13.6 (0.0-30.0)   | 3.2               | 7.2 (3.9-10.5)   | 0.8         | 2.0 (1.1-2.9)     |

Appendix 3, as supplied by the authors. Appendix to: Cox J, Apelian H, Moodie EEM, et al. Use of HIV pre-exposure prophylaxis among urban Canadian gay, bisexual and other men who have sex with men: a cross-sectional analysis of the Engage cohort study. *CMAJ Open* 2021. DOI:10.9778/cmajo.20200198. Copyright © 2021 The Author(s) or their employer(s). To receive this resource in an accessible format, please contact us at [cmajgroup.cmajca](mailto:cmajgroup.cmajca).

|                                                                                 |                                     | Montreal (n=476) |                  |             |                  | Toronto (n=238) |                   |            |                   | Vancouver (n=386) |                  |             |                  |
|---------------------------------------------------------------------------------|-------------------------------------|------------------|------------------|-------------|------------------|-----------------|-------------------|------------|-------------------|-------------------|------------------|-------------|------------------|
| Used PrEP in the P6M?                                                           |                                     | No (n=368)       |                  | Yes (n=108) |                  | No (n=160)      |                   | Yes (n=78) |                   | No (n=253)        |                  | Yes (n=133) |                  |
|                                                                                 |                                     | Crude %          | RDS % (95%CI)    | Crude %     | RDS % (95%CI)    | Crude %         | RDS % (95%CI)     | Crude %    | RDS % (95%CI)     | Crude %           | RDS % (95%CI)    | Crude %     | RDS % (95%CI)    |
| "If a guy is using PrEP it makes using condoms during anal sex less important." | Strongly agree/agree                | 31.1             | 29.1 (20.5-37.8) | 60.2        | 50.5 (31.3-69.6) | 46.2            | 42.4 (30.5-54.3)  | 80.8       | 81.2 (70.3-92.1)  | 47.0              | 35.3 (25.7-44.9) | 78.9        | 83.6 (73.9-93.3) |
|                                                                                 | Disagree/strongly disagree          | 68.9             | 70.9 (62.2-79.5) | 39.8        | 49.5 (30.4-68.7) | 53.8            | 57.6 (45.7-69.5)  | 19.2       | 18.8 (7.9-29.7)   | 53.0              | 64.7 (55.1-74.3) | 21.1        | 16.4 (6.7-26.1)  |
| <b>4.2 Community receptivity of PrEP</b>                                        |                                     |                  |                  |             |                  |                 |                   |            |                   |                   |                  |             |                  |
| "PrEP is well-perceived in the community."                                      | Strongly agree/agree/neutral        | 81.9             | 83.0 (77.1-88.9) | 76.9        | 77.0 (60.2-93.7) | 94.3            | 97.3 (95.0-99.5)  | 88.5       | 90.5 (81.0-100.0) | 91.5              | 96.4 (94.1-98.7) | 94.7        | 92.9 (87.9-98.0) |
|                                                                                 | Disagree/strongly disagree          | 18.1             | 17.0 (11.1-22.9) | 23.1        | 23.0 (6.3-39.8)  | 5.7             | 2.7 (0.5-5.0)     | 11.5       | 9.5 (0.0-19.0)    | 8.5               | 3.6 (1.3-5.9)    | 5.3         | 7.1 (2.0-12.1)   |
| "I am worried about being negatively judged for taking PrEP."                   | Strongly disagree/disagree/neutral  | 74.4             | 71.0 (62.4-79.5) | 78.7        | 76.7 (60.5-93.0) | 83.9            | 81.2 (73.0-89.3)  | 74.0       | 76.8 (64.5-89.2)  | 79.8              | 73.5 (63.4-83.6) | 85.0        | 81.3 (70.7-92.0) |
|                                                                                 | Agree/strongly agree                | 25.6             | 29.0 (20.5-37.6) | 21.3        | 23.3 (7.0-39.5)  | 16.1            | 18.8 (10.7-27.0)  | 26.0       | 23.2 (10.8-35.5)  | 20.2              | 26.5 (16.4-36.6) | 15.0        | 18.7 (8.0-29.3)  |
| <b>V. Dimensions related to reaching and paying for care</b>                    |                                     |                  |                  |             |                  |                 |                   |            |                   |                   |                  |             |                  |
| <b>5.1 Access to health services</b>                                            |                                     |                  |                  |             |                  |                 |                   |            |                   |                   |                  |             |                  |
| "Clinics where I could get PrEP are too far away."                              | Strongly disagree/disagree/neutral  | 93.2             | 94.5 (91.1-97.8) | 87.0        | 82.3 (68.0-96.7) | 92.1            | 93.5 (86.1-100.0) | 97.3       | 94.9 (83.1-106.7) | 92.7              | 87.0 (81.9-92.2) | 93.1        | 93.8 (88.4-99.3) |
|                                                                                 | Agree/strongly agree                | 6.8              | 5.5 (2.2-8.9)    | 13.0        | 17.7 (3.3-32.0)  | 7.9             | 6.5 (0.0-13.9)    | 2.7        | 5.1 (0.0-16.9)    | 7.3               | 13.0 (7.8-18.1)  | 6.9         | 6.2 (0.7-11.6)   |
| "At this time, how easy overall would you say it is for you to access PrEP?"    | Very easy/easy                      | 55.4             | 44.5 (35.1-53.9) | 89.8        | 85.1 (72.6-97.6) | 46.2            | 35.1 (23.7-46.4)  | 87.2       | 87.3 (76.4-98.1)  | 45.8              | 48.8 (37.9-59.6) | 88.7        | 79.7 (70.0-89.4) |
|                                                                                 | Difficult/very difficult/don't know | 44.6             | 55.5 (46.1-64.9) | 10.2        | 14.9 (2.4-27.4)  | 53.8            | 64.9 (53.6-76.3)  | 12.8       | 12.7 (1.9-23.6)   | 54.2              | 51.2 (40.4-62.1) | 11.3        | 20.3 (10.6-30.0) |
| "Most doctors do not know enough about PrEP to be comfortable prescribing it."  | Strongly disagree/disagree/neutral  | 84.5             | 84.4 (78.0-90.9) | 68.3        | 63.2 (44.2-82.3) | 65.5            | 65.7 (53.2-78.2)  | 56.6       | 61.0 (38.4-83.5)  | 65.4              | 79.7 (72.3-87.0) | 50.4        | 51.3 (36.7-65.8) |



|                                                             |                                    |                         |                      |                    |                      |                        |                      |                   |                      |                          |                      |                    |                      |
|-------------------------------------------------------------|------------------------------------|-------------------------|----------------------|--------------------|----------------------|------------------------|----------------------|-------------------|----------------------|--------------------------|----------------------|--------------------|----------------------|
|                                                             | Agree/strongly agree               | 15.5                    | 15.6 (9.1-22.0)      | 31.7               | 36.8 (17.7-55.8)     | 34.5                   | 34.3 (21.8-46.8)     | 43.4              | 39.0 (16.5-61.6)     | 34.6                     | 20.3 (13.0-27.7)     | 49.6               | 48.7 (34.2-63.3)     |
|                                                             |                                    | <b>Montreal (n=476)</b> |                      |                    |                      | <b>Toronto (n=238)</b> |                      |                   |                      | <b>Vancouver (n=386)</b> |                      |                    |                      |
| <b>Used PrEP in the P6M?</b>                                |                                    | <b>No (n=368)</b>       |                      | <b>Yes (n=108)</b> |                      | <b>No (n=160)</b>      |                      | <b>Yes (n=78)</b> |                      | <b>No (n=253)</b>        |                      | <b>Yes (n=133)</b> |                      |
|                                                             |                                    | <b>Crude %</b>          | <b>RDS % (95%CI)</b> | <b>Crude %</b>     | <b>RDS % (95%CI)</b> | <b>Crude %</b>         | <b>RDS % (95%CI)</b> | <b>Crude %</b>    | <b>RDS % (95%CI)</b> | <b>Crude %</b>           | <b>RDS % (95%CI)</b> | <b>Crude %</b>     | <b>RDS % (95%CI)</b> |
| <b>VI. Dimensions related to engaging in care</b>           |                                    |                         |                      |                    |                      |                        |                      |                   |                      |                          |                      |                    |                      |
| <b>6.1 Implications of ongoing PrEP use</b>                 |                                    |                         |                      |                    |                      |                        |                      |                   |                      |                          |                      |                    |                      |
| "I would have difficulty taking PrEP medication every day." | Strongly disagree/disagree/neutral | 64.9                    | 66.7 (58.1-75.3)     | 77.8               | 84.9 (73.9-96.0)     | 73.0                   | 71.4 (58.4-84.3)     | 96.1              | 95.2 (80.3-110.1)    | 81.5                     | 81.6 (73.4-89.9)     | 89.4               | 80.5 (72.9-88.1)     |
|                                                             | Agree/strongly agree               | 35.1                    | 33.3 (24.7-41.9)     | 22.2               | 15.1 (4.0-26.1)      | 27.0                   | 28.6 (15.7-41.6)     | 3.9               | 4.8 (0.0-19.7)       | 18.5                     | 18.4 (10.1-26.6)     | 10.6               | 19.5 (11.9-27.1)     |
| <b>VII. Scales*</b>                                         |                                    |                         |                      |                    |                      |                        |                      |                   |                      |                          |                      |                    |                      |
| <b>Treatment optimism-skepticism scale (range:2-36)</b>     | median (IQR)                       | 16 (6)                  |                      | 21 (7.3)           |                      | 19 (6)                 |                      | 22.5 (5.0)        |                      | 19 (6)                   |                      | 23 (6)             |                      |
| <b>Collective self-esteem scale (range: 3-12)</b>           | median (IQR)                       | 9 (3)                   |                      | 9 (3.5)            |                      | 9 (4)                  |                      | 10 (3)            |                      | 9 (3)                    |                      | 9 (4)              |                      |
| <b>Sexual Altruism scale (range: 6-30)</b>                  | median (IQR)                       | 27 (6)                  |                      | 27 (7)             |                      | 27 (5)                 |                      | 27.5 (6)          |                      | 28 (6)                   |                      | 29 (5)             |                      |
| <b>Sexual compulsivity scale (range: 1-4)</b>               | median (IQR)                       | 1.7 (1)                 |                      | 1.9 (1)            |                      | 1.7 (0.8)              |                      | 1.7 (0.8)         |                      | 1.6 (0.8)                |                      | 1.7 (0.8)          |                      |
| <b>Condom Barriers scale (range: 7- 35)</b>                 | median (IQR)                       | 19 (9)                  |                      | 17 (10)            |                      | 19 (8)                 |                      | 17 (10)           |                      | 19 (10)                  |                      | 17 (9)             |                      |

RDS respondent driven sampling, CI confidence interval.

\*The HIV Treatment Optimism-Skepticism Scale(1) includes 19 items related to the efficacy of antiretrovirals for both HIV treatment and reduced infectiousness. The scale ranges from 0 to 36, where higher scores indicate higher optimism in antiretroviral treatment.

The collective self-esteem scale(2) includes 3 items related to one's sense of belonging to the gay/bisexual/queer community. The scale ranges from 3 to 12, where higher score indicates higher collective self-esteem. The sexual altruism scale(3,4) includes 6 items related to "prevention altruism" or one's values, motivations, and practices in terms of sexual behavior to reduce HIV or STI transmission. The scale ranges from 6 to 30, where higher scores indicate higher sexual altruism.

## References (specific to Table S2.2)

1. Ven PVD, Crawford J, Kippax S, Knox S, Prestage G. A scale of optimism-scepticism in the context of HIV treatments. *AIDS Care*. 2000 Apr;12(2):171–6.
2. Herek GM, Glunt EK. Identity and Community Among Gay and Bisexual Men in the AIDS Era: Preliminary Findings From The Sacramento Men’s Health Study. In: *AIDS, Identity, and Community*. SAGE; 1995.
3. Nimmons D, Folkman S. Other-Sensitive Motivation for Safer Sex Among Gay Men: Expanding Paradigms for HIV Prevention. *AIDS Behav*. 1999 Dec 1;3(4):313–24.
4. O’Dell BL, Rosser BRS, Miner MH, Jacoby SM. HIV Prevention Altruism and Sexual Risk Behavior in HIV-Positive Men Who Have Sex with Men. *AIDS Behav*. 2008 Sep;12(5):713–20.

**Figure S1: Distribution of self-reported HIV-negative participants by Canadian PrEP guideline criteria (n=2008)**

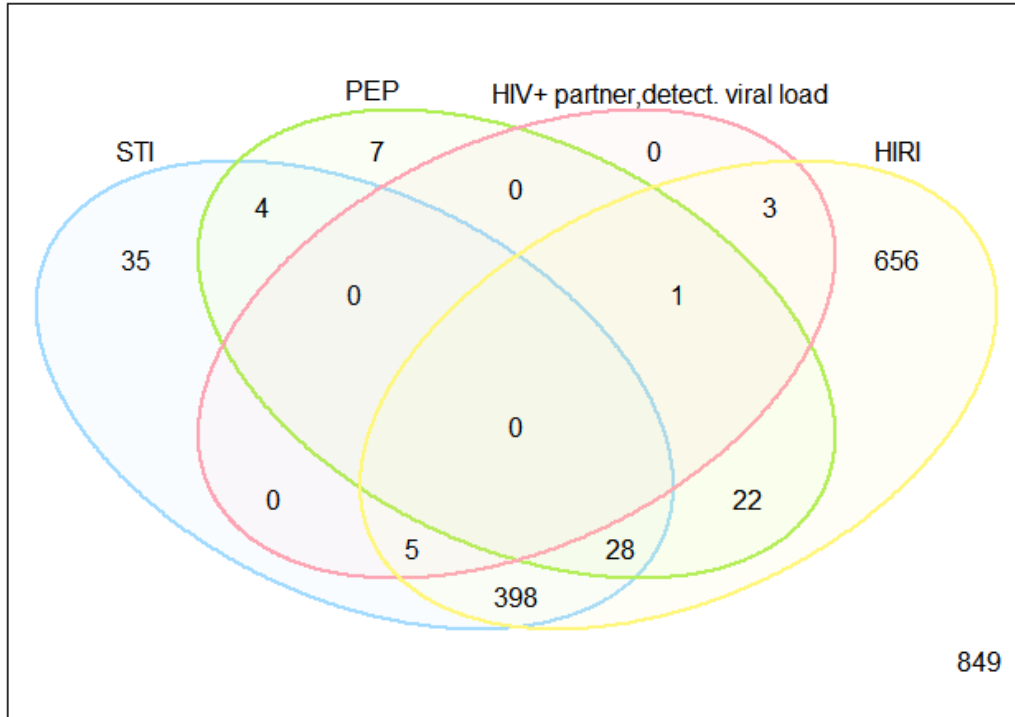

STI: condomless anal sex in the past six months and a diagnosis of syphilis or rectal sexually transmitted infection (STI) in the past year

PEP: condomless anal sex in the past six months and more than one previous use of HIV post-exposure prophylaxis (PEP)

HIV+ partner, detect. viral load: condomless anal sex in the past six months and an ongoing relationship with an HIV-positive partner who is at risk of transmitting HIV

HIRI: condomless anal sex in the past six months and an HIV incidence risk index for men who have sex with men (HIRI-MSM) score  $\geq 11$

**Table S3: Distribution of self-reported HIV-negative participants by Canadian PrEP guideline criteria (n=2008)**

|                                                                                                                                       | Self-reported HIV-negative or unknown participants |                    |                      |                   |
|---------------------------------------------------------------------------------------------------------------------------------------|----------------------------------------------------|--------------------|----------------------|-------------------|
|                                                                                                                                       | Montreal<br>(n=968)                                | Toronto<br>(n=418) | Vancouver<br>(n=622) | Total<br>(n=2008) |
|                                                                                                                                       | n (crude %)                                        | n (crude %)        | n (crude %)          | n (crude %)       |
| <b>PrEP recommendation criteria*</b>                                                                                                  |                                                    |                    |                      |                   |
| CAS and syphilis or rectal bacterial STI (CAS and STI)                                                                                | 212<br>(21.9%)                                     | 96 (23.0%)         | 162<br>(26.0%)       | 470 (23.4%)       |
| CAS and recurrent use of PEP (CAS and PEP)                                                                                            | 45 (4.6%)                                          | 6 (1.4%)           | 11 (1.8%)            | 62 (3.1%)         |
| CAS and ongoing relationship with an HIV+ partner at risk of transmitting HIV (CAS and HIV+ partner)                                  | 2 (0.2%)                                           | 3 (0.7%)           | 4 (0.6%)             | 9 (0.4%)          |
| CAS and HIRI score $\geq 11$ (CAS and HIRI+)                                                                                          | 482<br>(49.8%)                                     | 243<br>(58.1%)     | 388<br>(62.4%)       | 1113<br>(55.4%)   |
| <b>Contribution of each criterion to PrEP recommendation</b>                                                                          |                                                    |                    |                      |                   |
| Meets 1 criterion only: CAS and STI                                                                                                   | 20 (2.1%)                                          | 4 (1.0%)           | 11 (1.8%)            | 35 (1.7%)         |
| Meets 1 criterion only: CAS and PEP                                                                                                   | 5 (0.5%)                                           | 0 (0%)             | 2 (0.3%)             | 7 (0.3%)          |
| Meets 1 criterion only: CAS and HIV+ partner                                                                                          | 0 (0%)                                             | 0 (0%)             | 0 (0%)               | 0 (0%)            |
| Meets 1 criterion only: CAS and HIRI+                                                                                                 | 277<br>(28.6%)                                     | 147<br>(35.2%)     | 232<br>(37.3%)       | 656 (32.7%)       |
| Meets 2 criteria                                                                                                                      | 188<br>(19.4%)                                     | 91 (21.8%)         | 148<br>(23.8%)       | 427 (21.3%)       |
| Meets 3 criteria                                                                                                                      | 21 (2.2%)                                          | 5 (1.2%)           | 8 (1.3%)             | 34 (1.7%)         |
| Meets all 4 criteria                                                                                                                  | 0 (0%)                                             | 0 (0%)             | 0 (0%)               | 0 (0%)            |
| Does not meet any of the criteria/not PrEP recommended                                                                                | 457<br>(47.2%)                                     | 171<br>(40.9%)     | 221<br>(35.5%)       | 849 (42.3%)       |
| * Proportions are not mutually exclusive<br>CAS condomless anal sex STI sexually transmitted infection, PEP post exposure prophylaxis |                                                    |                    |                      |                   |

| <b>Table S4: Reasons for participation in the Engage Study</b>                               |                         |                       |                        |                             |
|----------------------------------------------------------------------------------------------|-------------------------|-----------------------|------------------------|-----------------------------|
|                                                                                              | <b>MTL<br/>(n=1179)</b> | <b>TO<br/>(n=517)</b> | <b>VAN<br/>(n=753)</b> | <b>Overall<br/>(n=2449)</b> |
| <b>“Please tell us the main reason why you are interested in participating in our study”</b> |                         |                       |                        |                             |
| Interested in sexual health and HIV                                                          | 371<br>(31.5%)          | 163<br>(31.5%)        | 228<br>(30.3%)         | 762<br>(31.1%)              |
| Wanted to help the community                                                                 | 297<br>(25.2%)          | 140<br>(27.1%)        | 185<br>(24.6%)         | 622<br>(25.4%)              |
| Interested in gay men's issues                                                               | 233<br>(19.8%)          | 85<br>(16.4%)         | 159<br>(21.1%)         | 477<br>(19.5%)              |
| My friend/partner wanted me to participate                                                   | 127<br>(10.8%)          | 79<br>(15.3%)         | 101<br>(13.4%)         | 307<br>(12.5%)              |
| I am mostly interested in the \$50 incentive for participating                               | 134<br>(11.4%)          | 47<br>(9.1%)          | 77<br>(10.2%)          | 258<br>(10.5%)              |
| None of the above                                                                            | 17<br>(1.4%)            | 3<br>(0.6%)           | 3<br>(0.4%)            | 23<br>(0.9%)                |
