# Supplementary material for: Use of HIV pre-exposure prophylaxis among urban Canadian gay, bisexual and other men who have sex with men: a cross-sectional analysis of the Engage cohort study
Source: PubMed Central journal article supplement — CMAJ Open. 2021 May 21;9(2):E529–38. doi: 10.9778/cmajo.20200198 (PMC8177951; doi:10.9778/cmajo.20200198), 2021-05-21

## RDS recruitment trees

**Figure S2: RDS recruitment tree – Montreal sample (n=1179)**

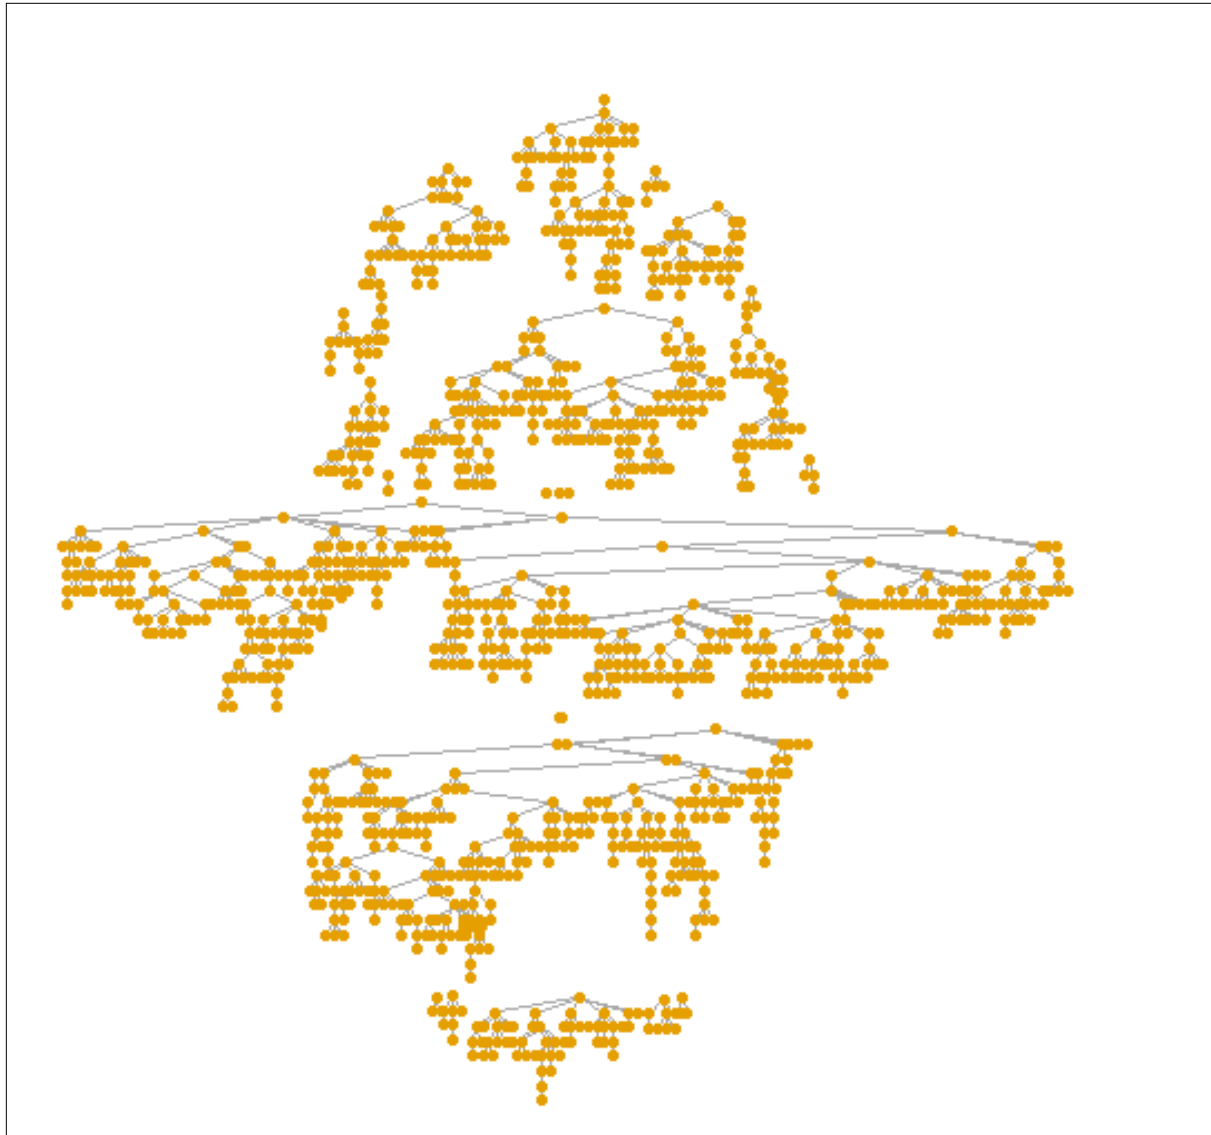

**Figure S3: RDS recruitment tree – Toronto sample (n=517)**

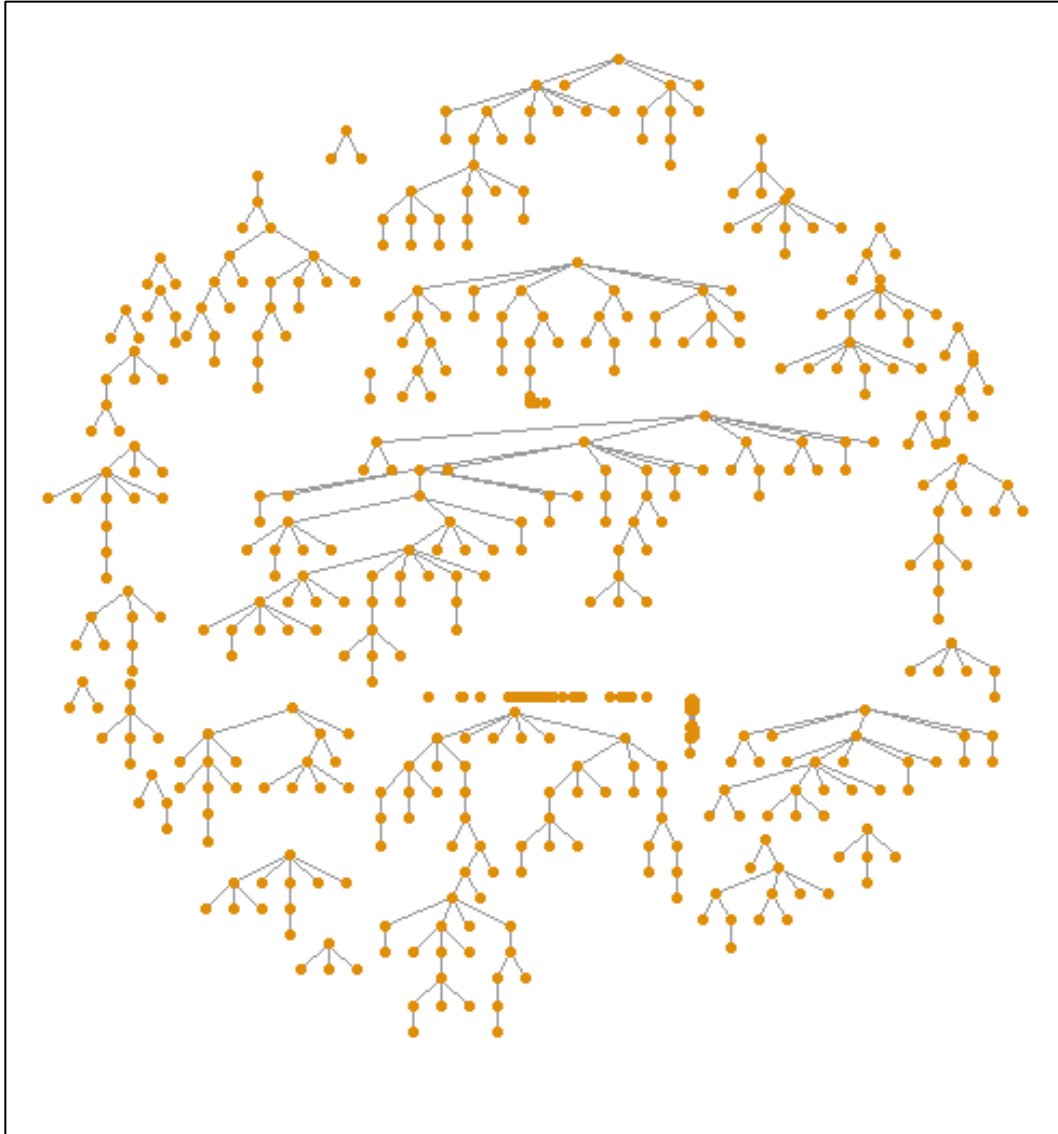

**Figure S4: RDS recruitment tree – Vancouver sample (n=753)**

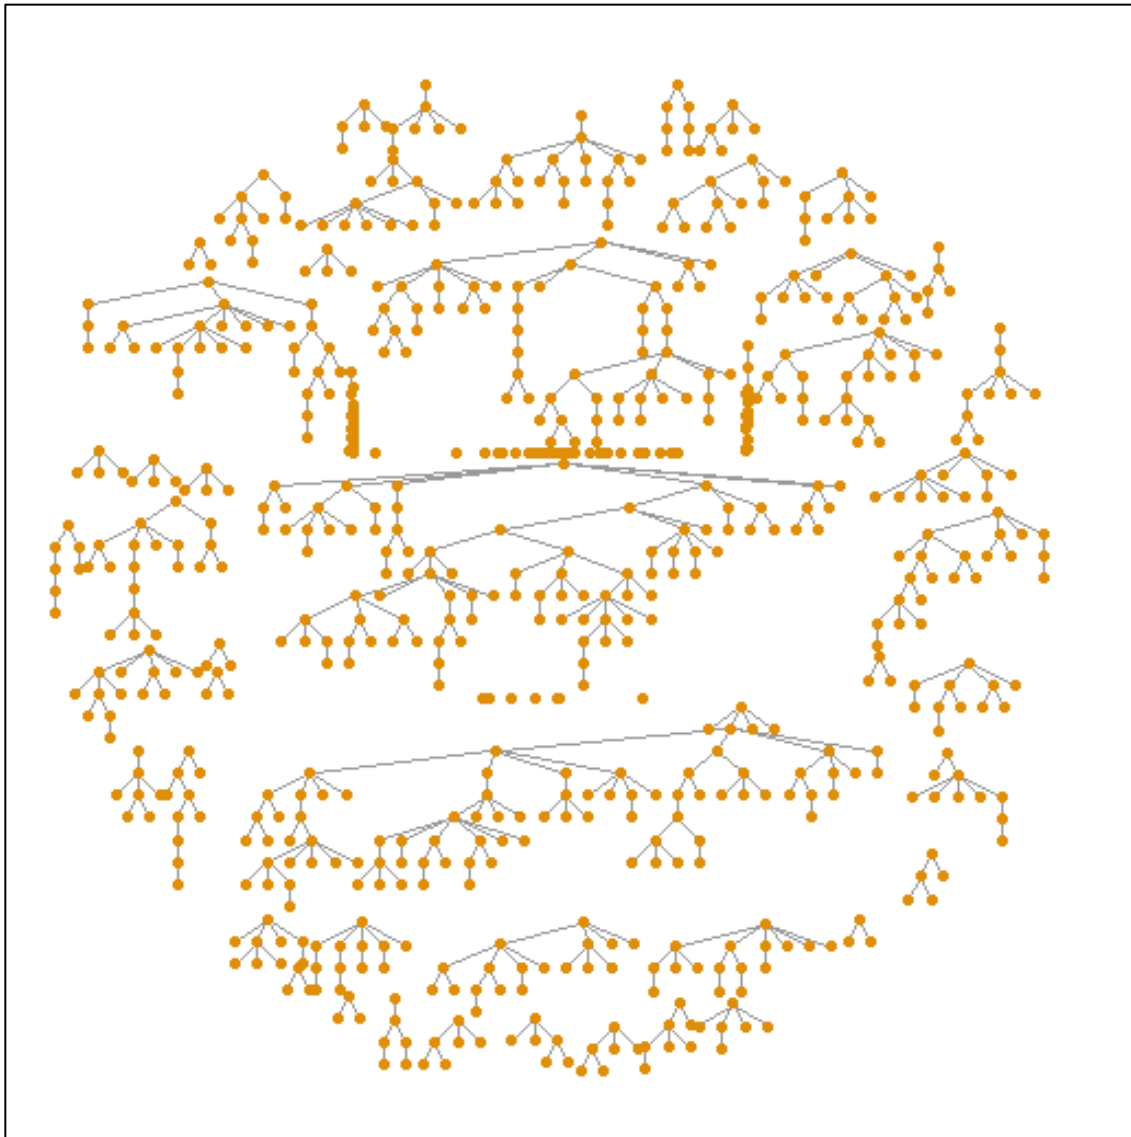

Supplement: supp_9.2.E529_2020-0198-4-at.pdf [file supp_9.2.E529_2020-0198-4-at.pdf]
