# Supplementary material for: Use of HIV pre-exposure prophylaxis among urban Canadian gay, bisexual and other men who have sex with men: a cross-sectional analysis of the Engage cohort study
Source: PubMed Central journal article supplement — CMAJ Open. 2021 May 21;9(2):E529–38. doi: 10.9778/cmajo.20200198 (PMC8177951; doi:10.9778/cmajo.20200198), 2021-05-21
Supplement: supp_9.2.E529_strobe.pdf [file supp_9.2.E529_strobe.pdf]

## HIV pre-exposure prophylaxis (PrEP) use among Urban Canadian Gay, Bisexual and Other Men Who Have Sex with Men for whom PrEP is clinically recommended: Baseline Results from the Engage Cohort Study

STROBE Statement—Checklist of items that should be included in reports of *cross-sectional studies*

The page numbers indicated in this document refer to those at the bottom-right corner of the clean version of the manuscript.

|                              | Item No | Recommendation                                                                                                                                                                           | Page No |
|------------------------------|---------|------------------------------------------------------------------------------------------------------------------------------------------------------------------------------------------|---------|
| <b>Title and abstract</b>    | 1       | (a) Indicate the study's design with a commonly used term in the title or the abstract                                                                                                   | 2       |
|                              |         | (b) Provide in the abstract an informative and balanced summary of what was done and what was found                                                                                      | 2       |
| <b>Introduction</b>          |         |                                                                                                                                                                                          |         |
| Background/rationale         | 2       | Explain the scientific background and rationale for the investigation being reported                                                                                                     | 3       |
| Objectives                   | 3       | State specific objectives, including any prespecified hypotheses                                                                                                                         | 3       |
| <b>Methods</b>               |         |                                                                                                                                                                                          |         |
| Study design                 | 4       | Present key elements of study design early in the paper                                                                                                                                  | 3-4     |
| Setting                      | 5       | Describe the setting, locations, and relevant dates, including periods of recruitment, exposure, follow-up, and data collection                                                          | 4       |
| Participants                 | 6       | (a) Give the eligibility criteria, and the sources and methods of selection of participants                                                                                              | 4       |
|                              |         |                                                                                                                                                                                          | 6       |
| Variables                    | 7       | Clearly define all outcomes, exposures, predictors, potential confounders, and effect modifiers. Give diagnostic criteria, if applicable                                                 | 5       |
| Data sources/<br>measurement | 8*      | For each variable of interest, give sources of data and details of methods of assessment (measurement). Describe comparability of assessment methods if there is more than one group     | 5       |
| Bias                         | 9       | Describe any efforts to address potential sources of bias                                                                                                                                | 5       |
| Study size                   | 10      | Explain how the study size was arrived at                                                                                                                                                | 4       |
| Quantitative variables       | 11      | Explain how quantitative variables were handled in the analyses. If applicable, describe which groupings were chosen and why                                                             | 5,6     |
| Statistical methods          | 12      | (a) Describe all statistical methods, including those used to control for confounding                                                                                                    | 5,6     |
|                              |         | (b) Describe any methods used to examine subgroups and interactions                                                                                                                      | n/a     |
|                              |         | (c) Explain how missing data were addressed                                                                                                                                              | 6       |
|                              |         | (d) If applicable, describe analytical methods taking account of sampling strategy                                                                                                       | 5       |
|                              |         | (e) Describe any sensitivity analyses                                                                                                                                                    | 6       |
| <b>Results</b>               |         |                                                                                                                                                                                          |         |
| Participants                 | 13*     | (a) Report numbers of individuals at each stage of study—eg numbers potentially eligible, examined for eligibility, confirmed eligible, included in the study, completing follow-up, and | 6       |

|                          |     |                                                                                                                                                                                                              |                                 |
|--------------------------|-----|--------------------------------------------------------------------------------------------------------------------------------------------------------------------------------------------------------------|---------------------------------|
|                          |     | analysed                                                                                                                                                                                                     |                                 |
|                          |     | (b) Give reasons for non-participation at each stage                                                                                                                                                         | n/a                             |
|                          |     | (c) Consider use of a flow diagram                                                                                                                                                                           | Fig 1                           |
| Descriptive data         | 14* | (a) Give characteristics of study participants (eg demographic, clinical, social) and information on exposures and potential confounders                                                                     | 6                               |
|                          |     | (b) Indicate number of participants with missing data for each variable of interest                                                                                                                          | 6                               |
|                          |     |                                                                                                                                                                                                              | 8                               |
| Outcome data             | 15* | Report numbers of outcome events or summary measures                                                                                                                                                         | 6                               |
| Main results             | 16  | (a) Give unadjusted estimates and, if applicable, confounder-adjusted estimates and their precision (eg, 95% confidence interval). Make clear which confounders were adjusted for and why they were included | 6-7                             |
|                          |     | (b) Report category boundaries when continuous variables were categorized                                                                                                                                    | Table 2, Table S2.1, Table S2.2 |
|                          |     | (c) If relevant, consider translating estimates of relative risk into absolute risk for a meaningful time period                                                                                             | n/a                             |
| Other analyses           | 17  | Report other analyses done—eg analyses of subgroups and interactions, and sensitivity analyses                                                                                                               | 7                               |
| <b>Discussion</b>        |     |                                                                                                                                                                                                              |                                 |
| Key results              | 18  | Summarise key results with reference to study objectives                                                                                                                                                     | 7                               |
| Limitations              | 19  | Discuss limitations of the study, taking into account sources of potential bias or imprecision. Discuss both direction and magnitude of any potential bias                                                   | 8,9                             |
| Interpretation           | 20  | Give a cautious overall interpretation of results considering objectives, limitations, multiplicity of analyses, results from similar studies, and other relevant evidence                                   | 7-9                             |
| Generalisability         | 21  | Discuss the generalisability (external validity) of the study results                                                                                                                                        | 9                               |
| <b>Other information</b> |     |                                                                                                                                                                                                              |                                 |
| Funding                  | 22  | Give the source of funding and the role of the funders for the present study and, if applicable, for the original study on which the present article is based                                                | 10                              |
